# Supplementary material for: Structure Elucidation and Botanical Characterization of Diterpenes from a Specific Type of Bee Glue
Source: MDPI journal article supplement (doi:10.3390/molecules22071185), 2017-07-14

# Structure Elucidation and Botanical Characterization of Diterpenes from a Specific Type of Bee Glue

Noushin Aminimoghadamfarouj and Alireza Nematollahi \*

Faculty of Pharmacy A15, The University of Sydney, Sydney NSW 2006, Australia;  
nami1357@uni.sydney.edu.au (N.A)

\*Correspondence: anem7250@uni.sydney.edu.au; Tel.: +61-2-9351-6528; Fax: +61-2-9351-4391

## Supporting Information

### Table of contents

|                                                       |        |
|-------------------------------------------------------|--------|
| Compound 1- <sup>1</sup> H NMR.....                   | - 2 -  |
| Compound 1- <sup>13</sup> C NMR.....                  | - 3 -  |
| Compound 1- <sup>1</sup> H- <sup>1</sup> H COSY ..... | - 4 -  |
| Compound 2- <sup>1</sup> H NMR.....                   | - 5 -  |
| Compound 2- <sup>13</sup> C NMR.....                  | - 6 -  |
| Compound 2- <sup>1</sup> H- <sup>1</sup> H COSY ..... | - 7 -  |
| Compound 3- <sup>1</sup> H NMR.....                   | - 8 -  |
| Compound 3- <sup>13</sup> C NMR.....                  | - 9 -  |
| Compound 3- <sup>1</sup> H- <sup>1</sup> H COSY ..... | - 10 - |
| Compound 4- <sup>1</sup> H NMR.....                   | - 11 - |
| Compound 4- <sup>13</sup> C NMR.....                  | - 12 - |
| Compound 4- <sup>1</sup> H- <sup>1</sup> H COSY ..... | - 13 - |
| Compound 4- <sup>1</sup> H- <sup>1</sup> H ROESY..... | - 14 - |
| Compound 5- <sup>1</sup> H NMR.....                   | - 15 - |
| Compound 5- <sup>13</sup> C NMR.....                  | - 16 - |
| Compound 5- <sup>1</sup> H- <sup>1</sup> H COSY ..... | - 17 - |
| Compound 1 .....                                      | - 18 - |
| Compound 2 .....                                      | - 19 - |
| Compound 3 .....                                      | - 20 - |
| Compound 4 .....                                      | - 21 - |
| Compound 5 .....                                      | - 22 - |
| Schematic formation of compound 3 .....               | - 23 - |

# Compound 1- <sup>1</sup>H NMR

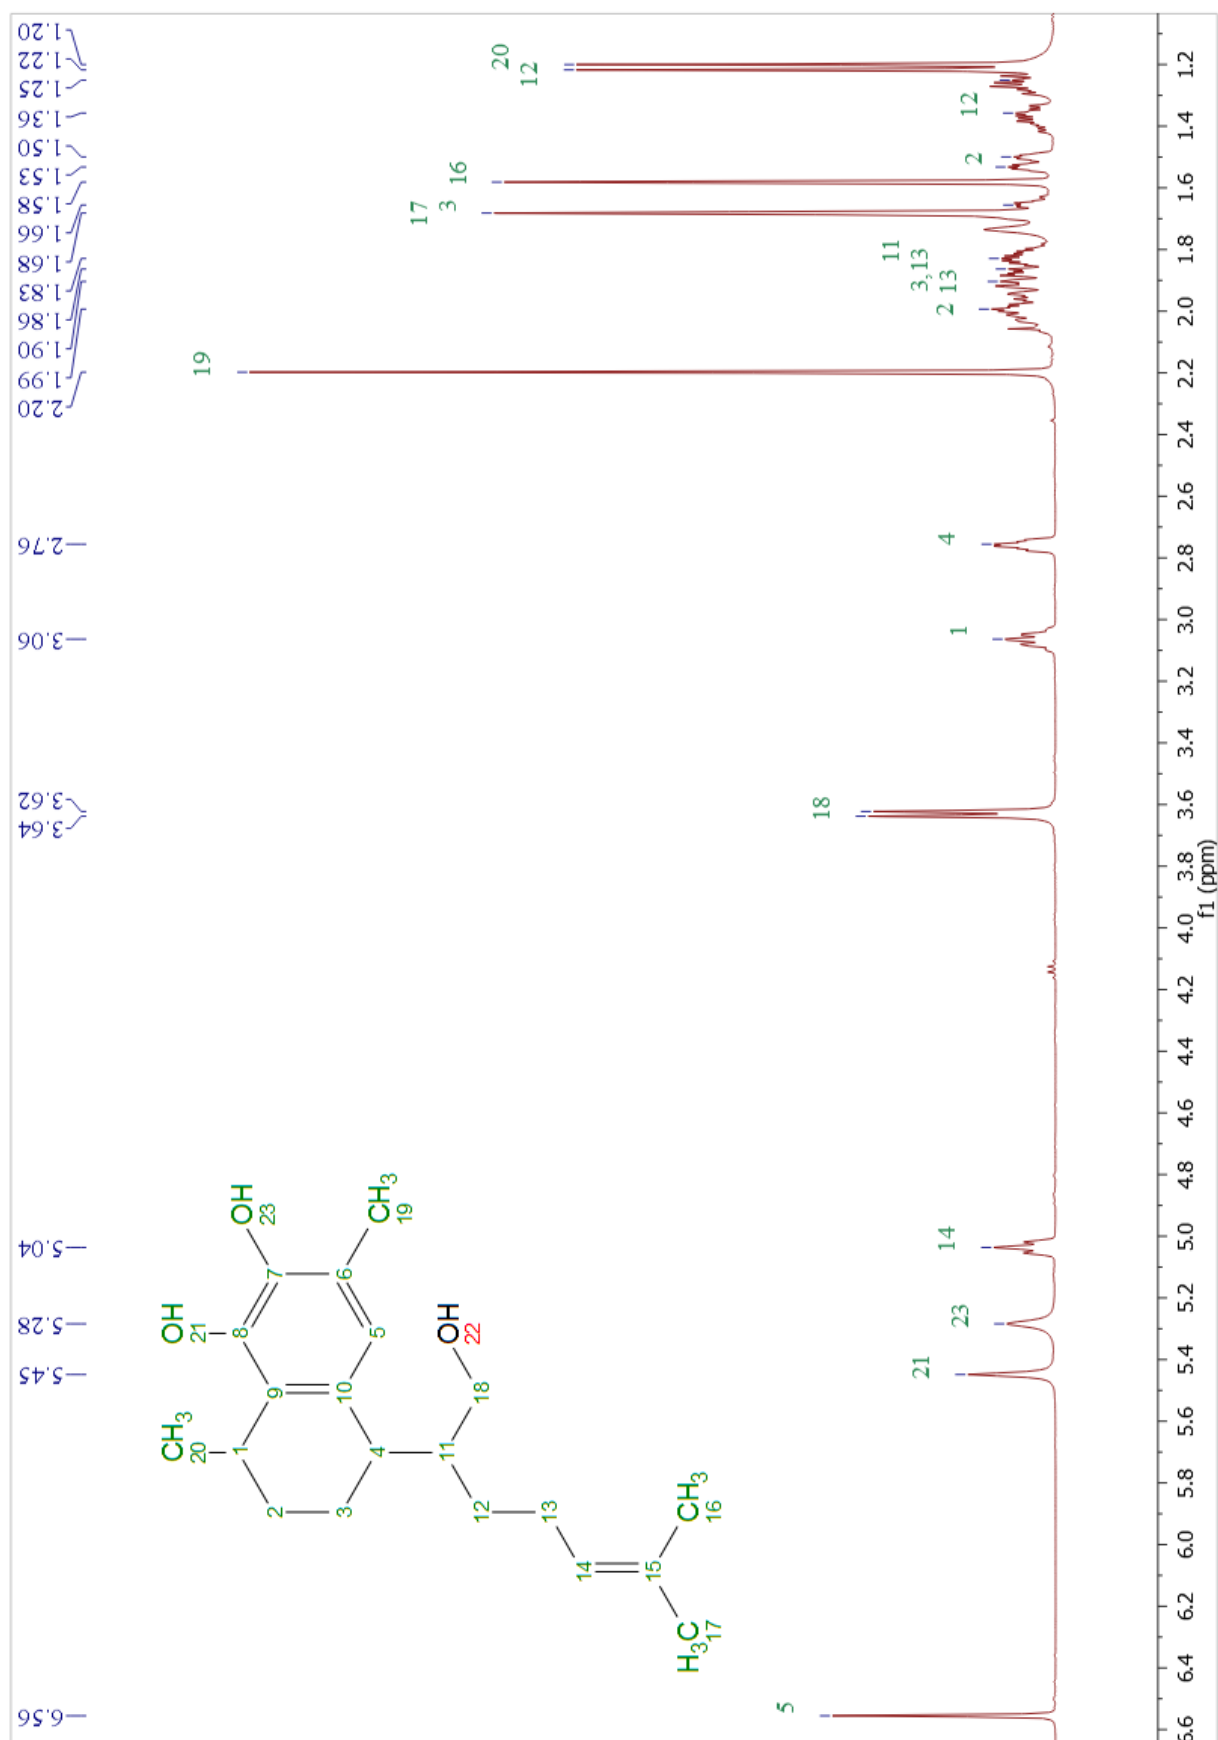

# Compound 1- <sup>13</sup>C NMR

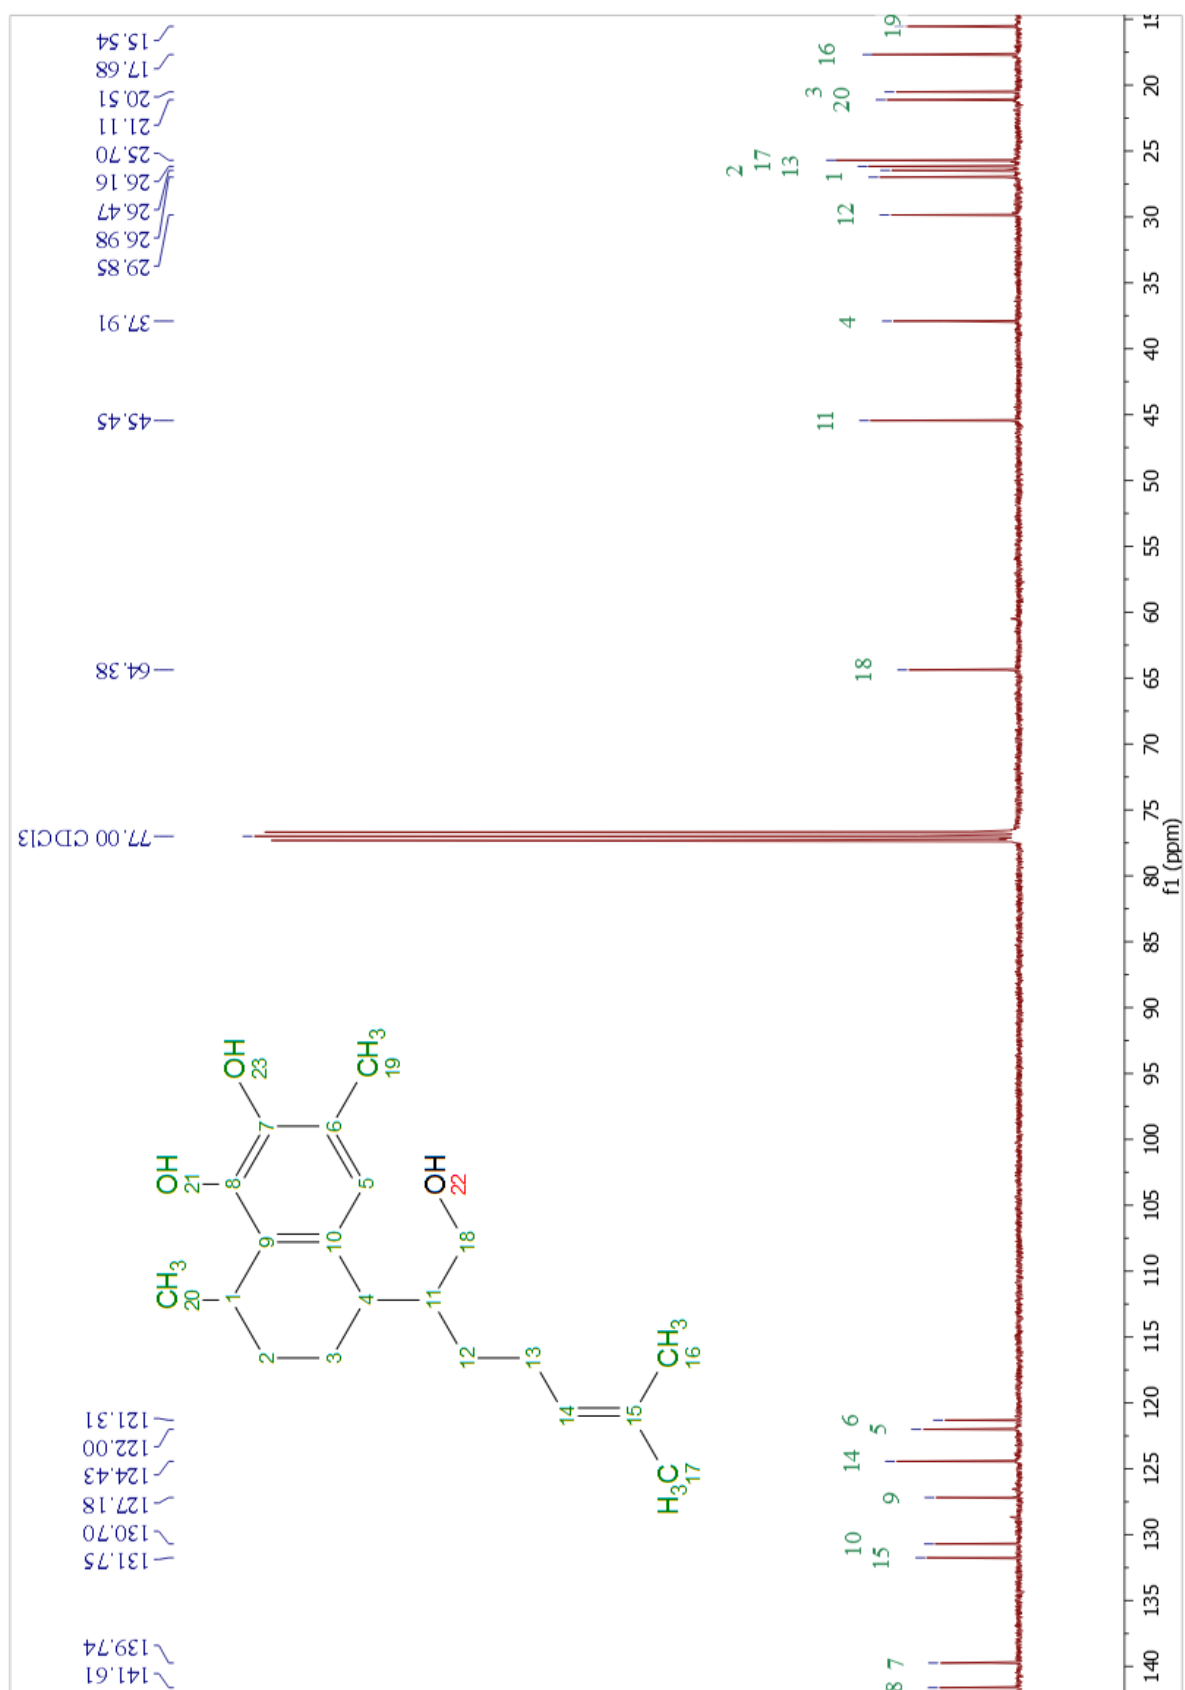

# Compound 1- $^1\text{H}$ - $^1\text{H}$ COSY

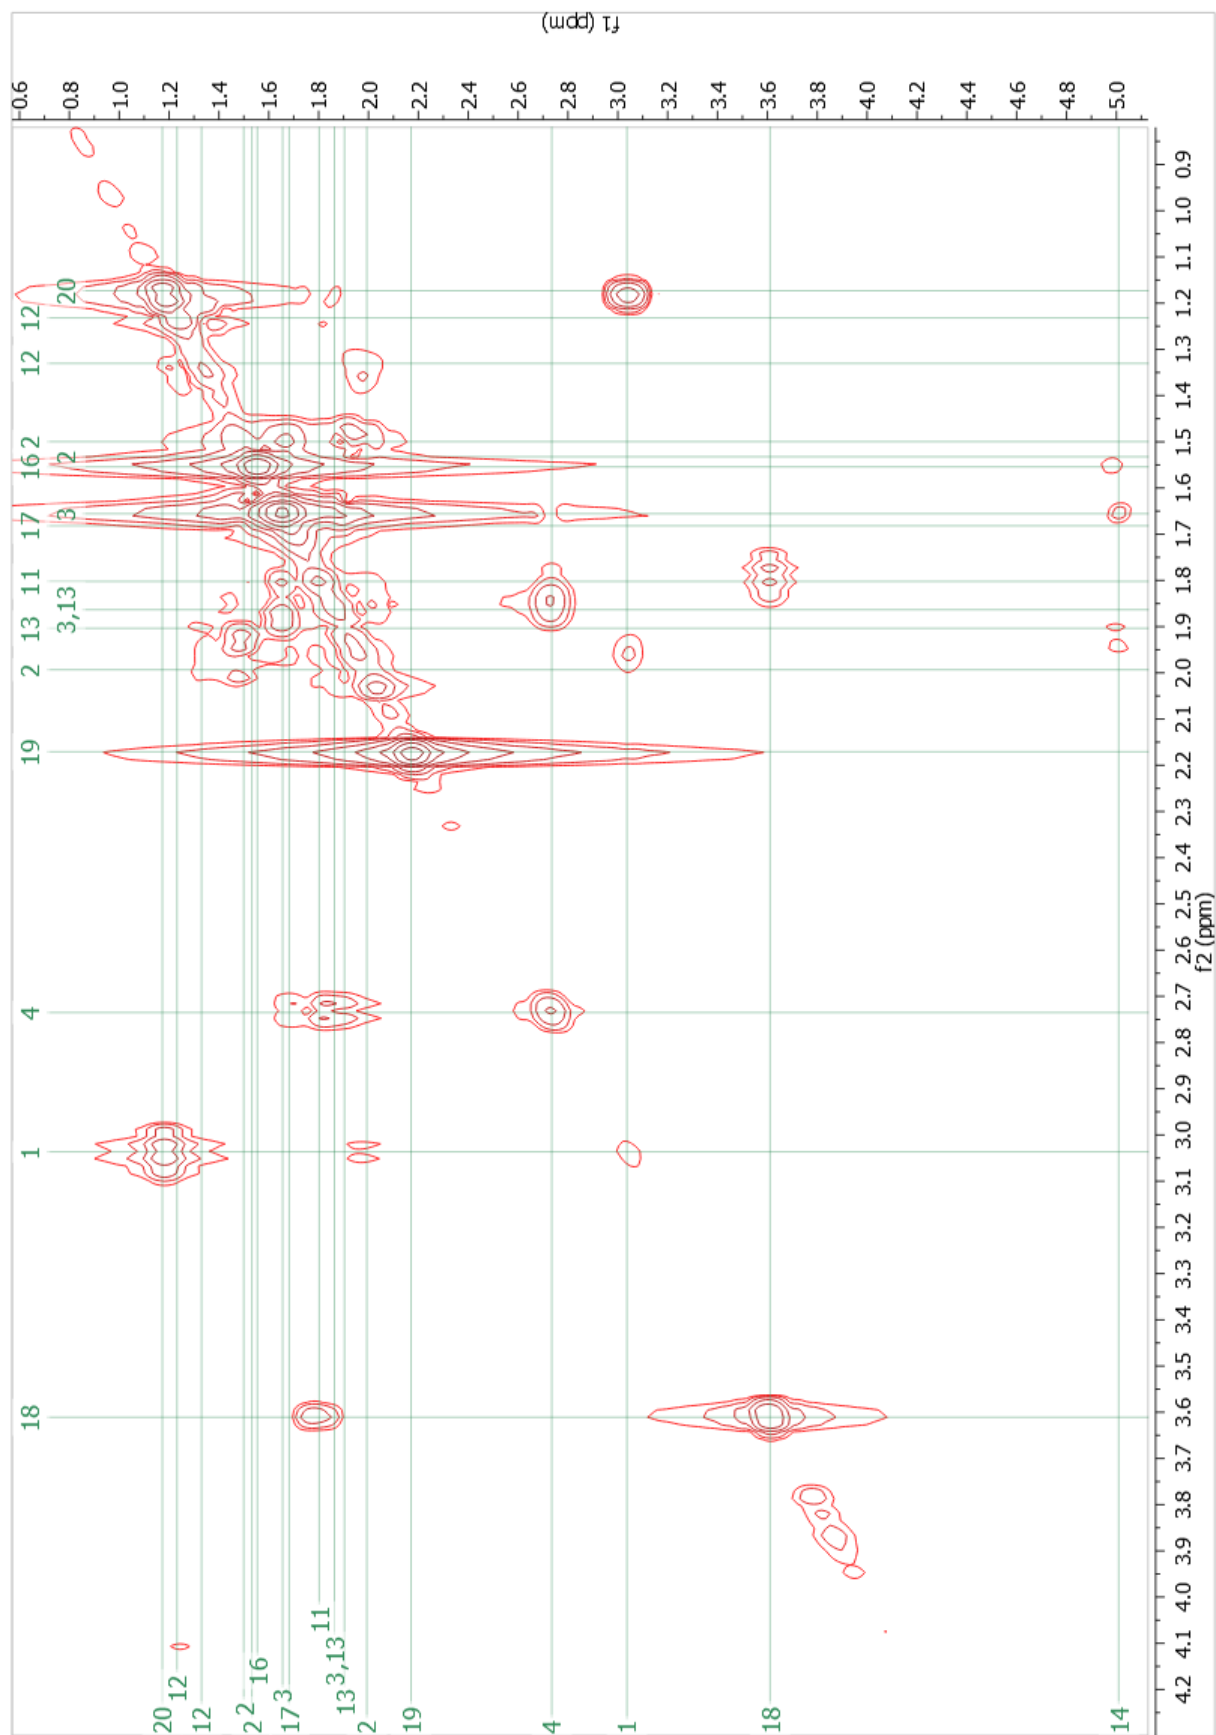

# Compound 2- <sup>1</sup>H NMR

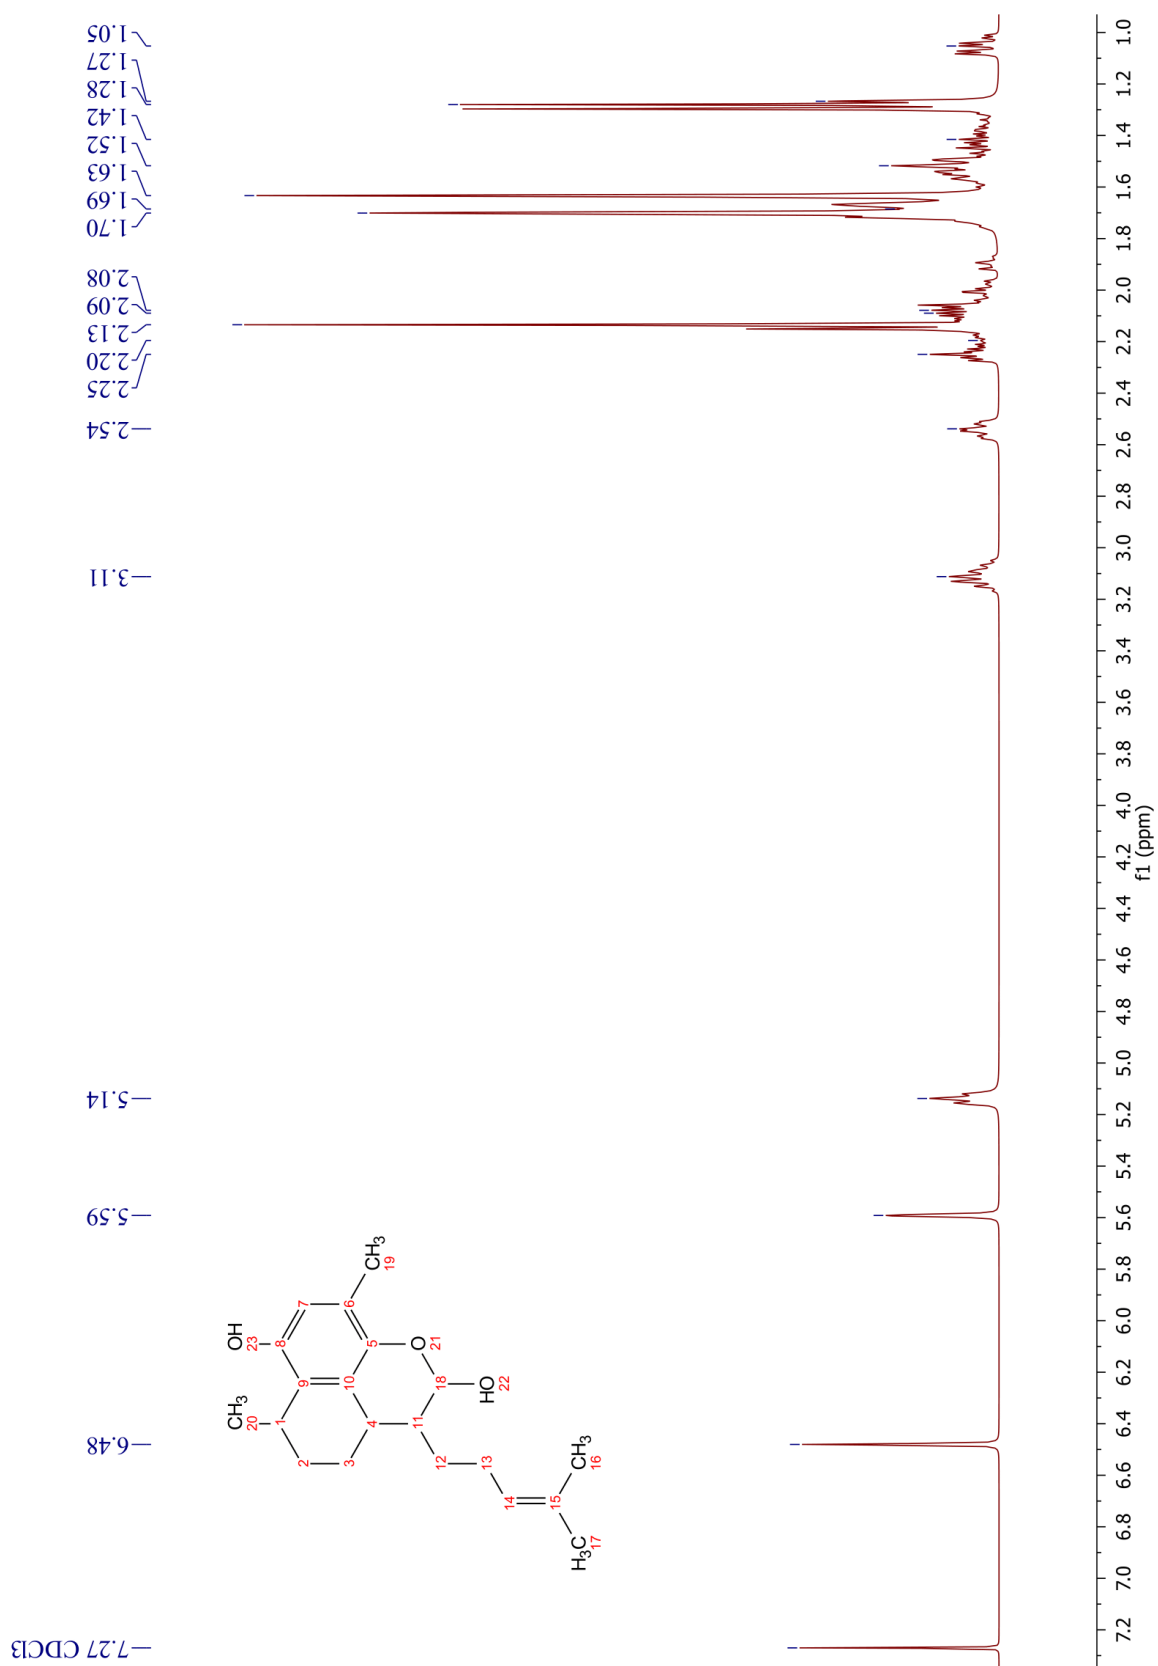

# Compound 2- <sup>13</sup>C NMR

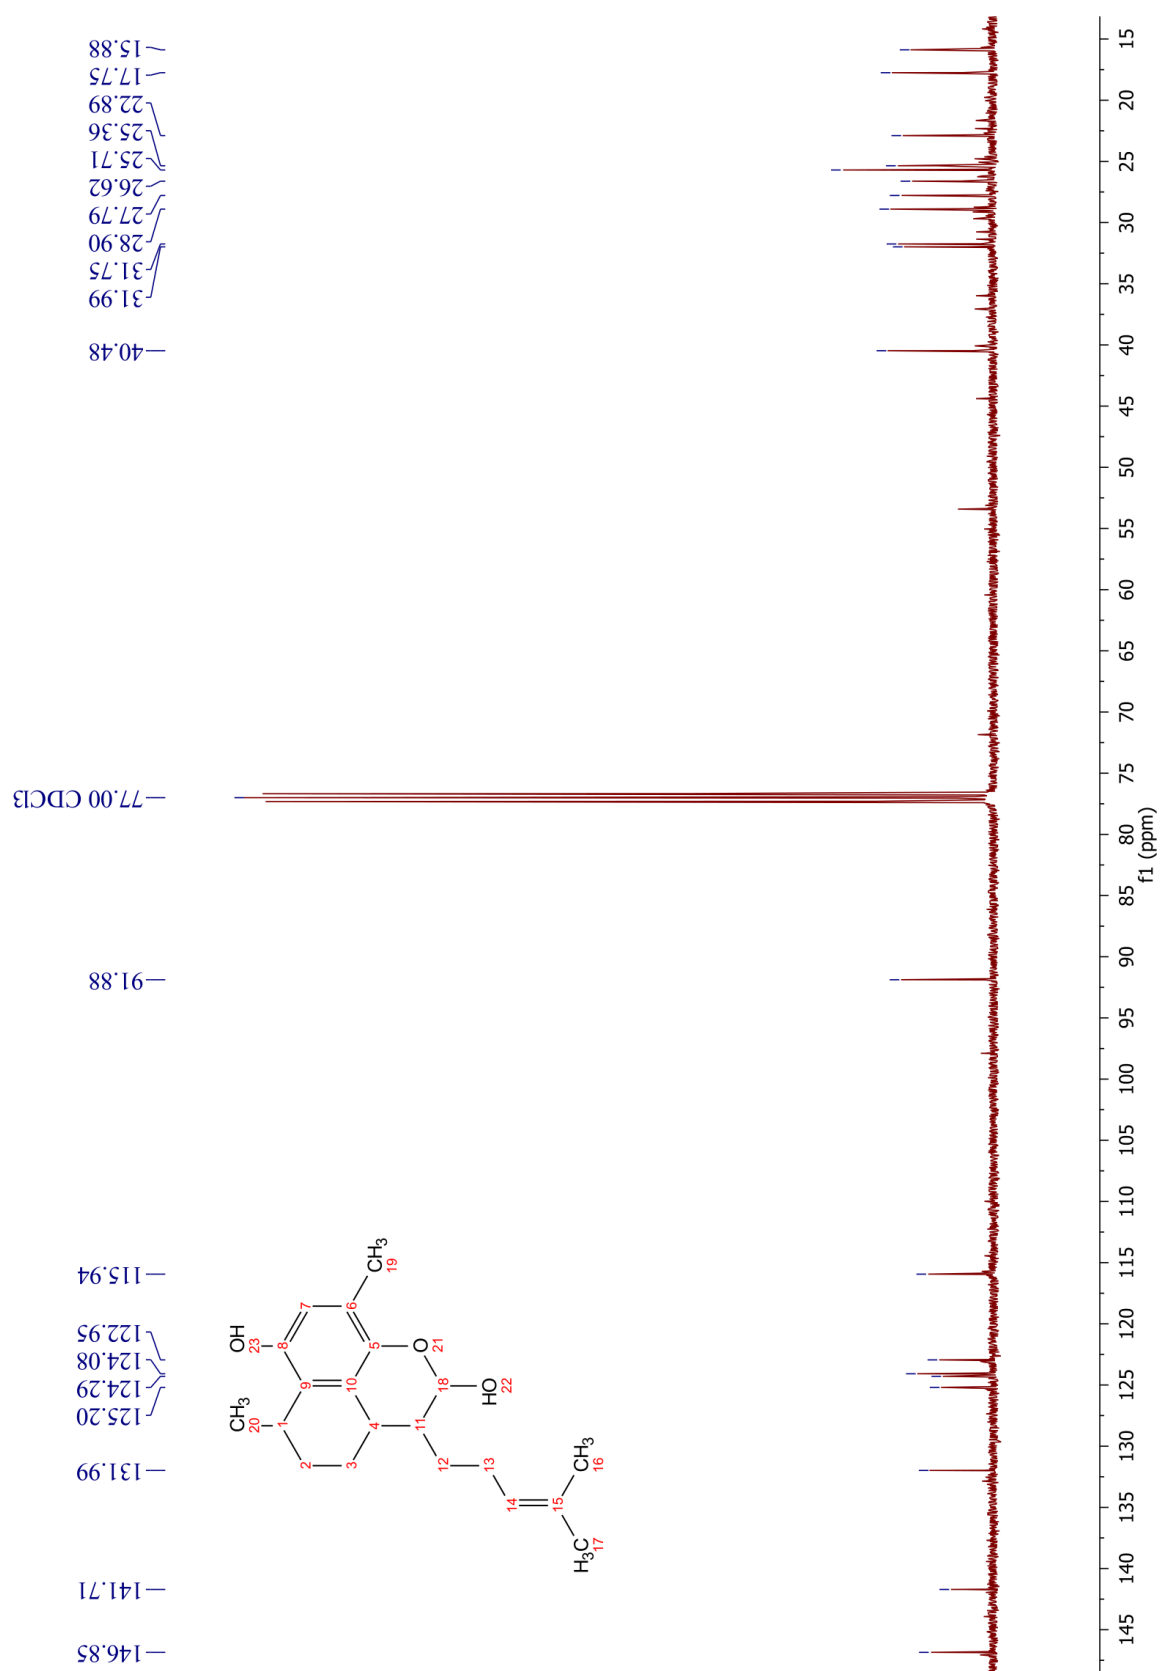

## Compound 2- $^1\text{H}$ - $^1\text{H}$ COSY

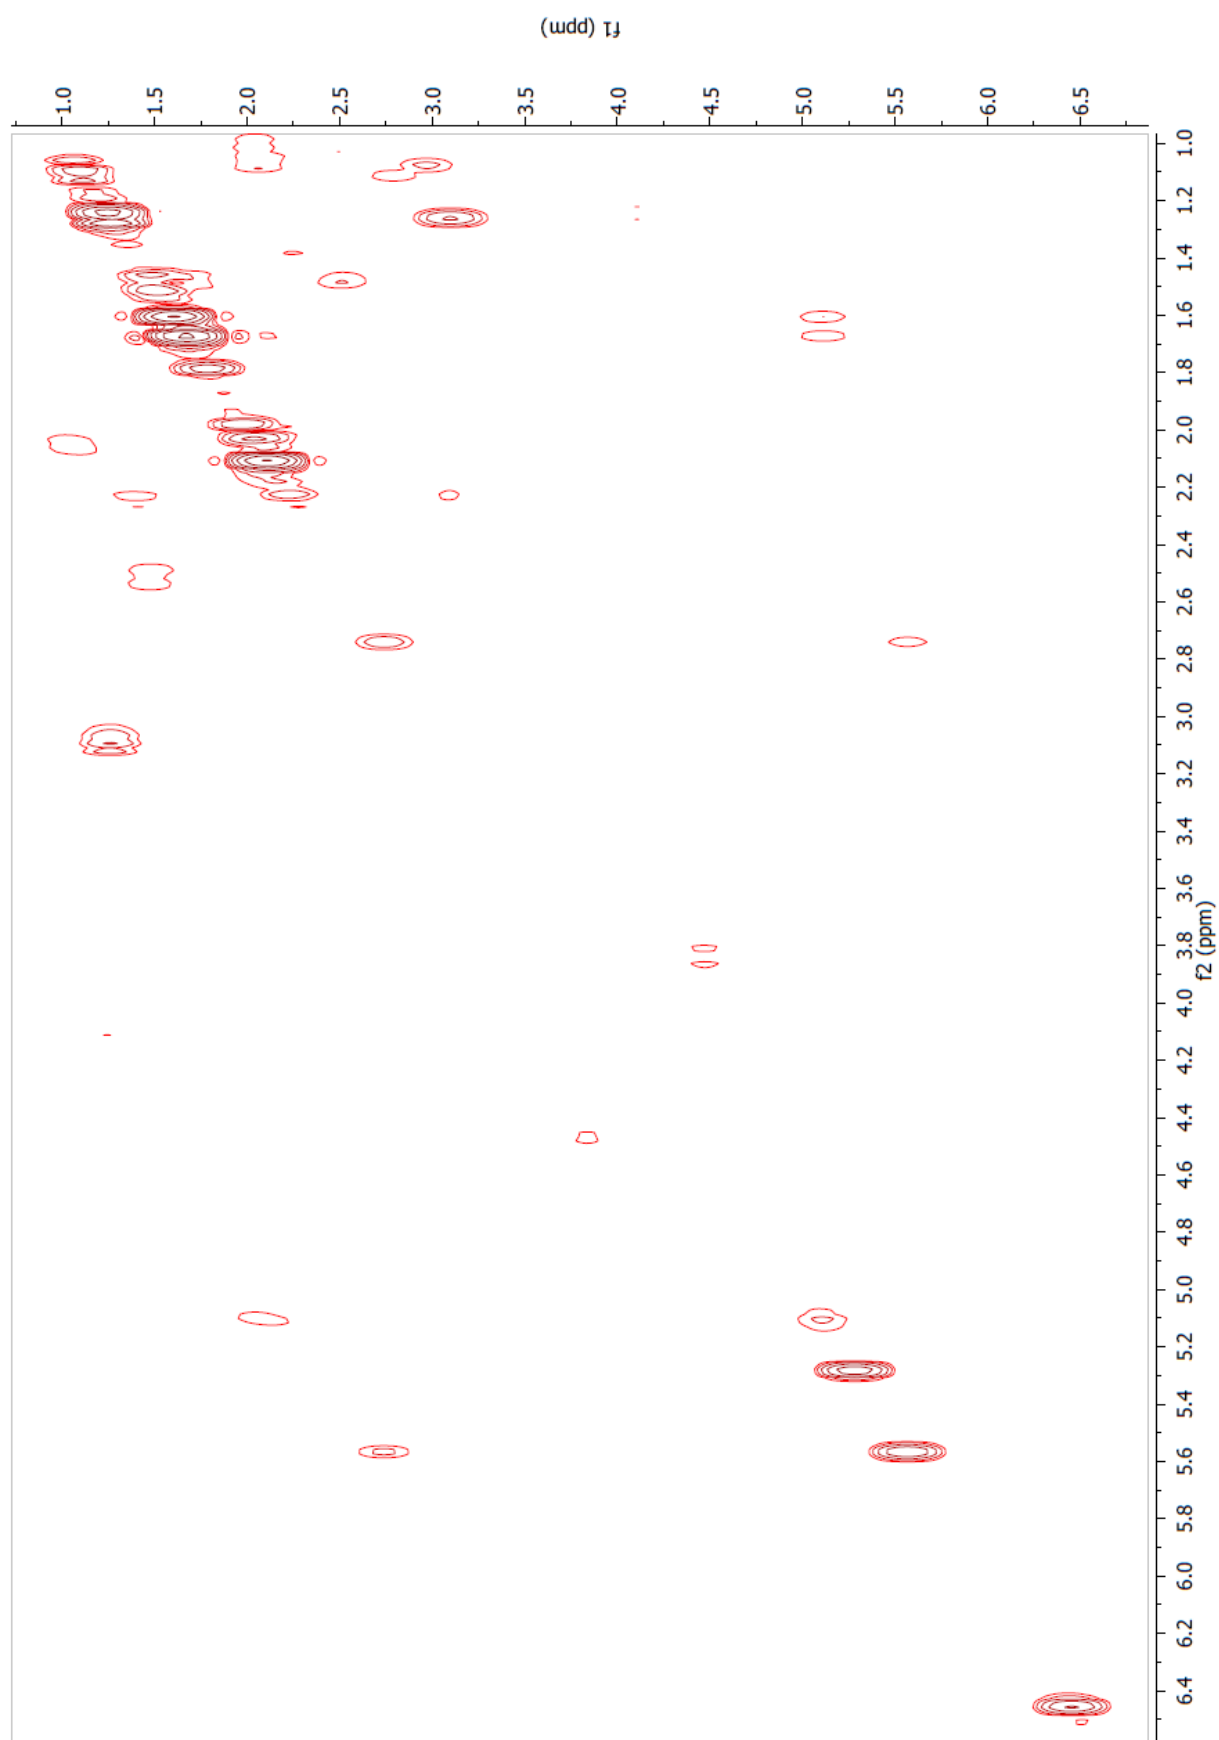

# Compound 3- <sup>1</sup>H NMR

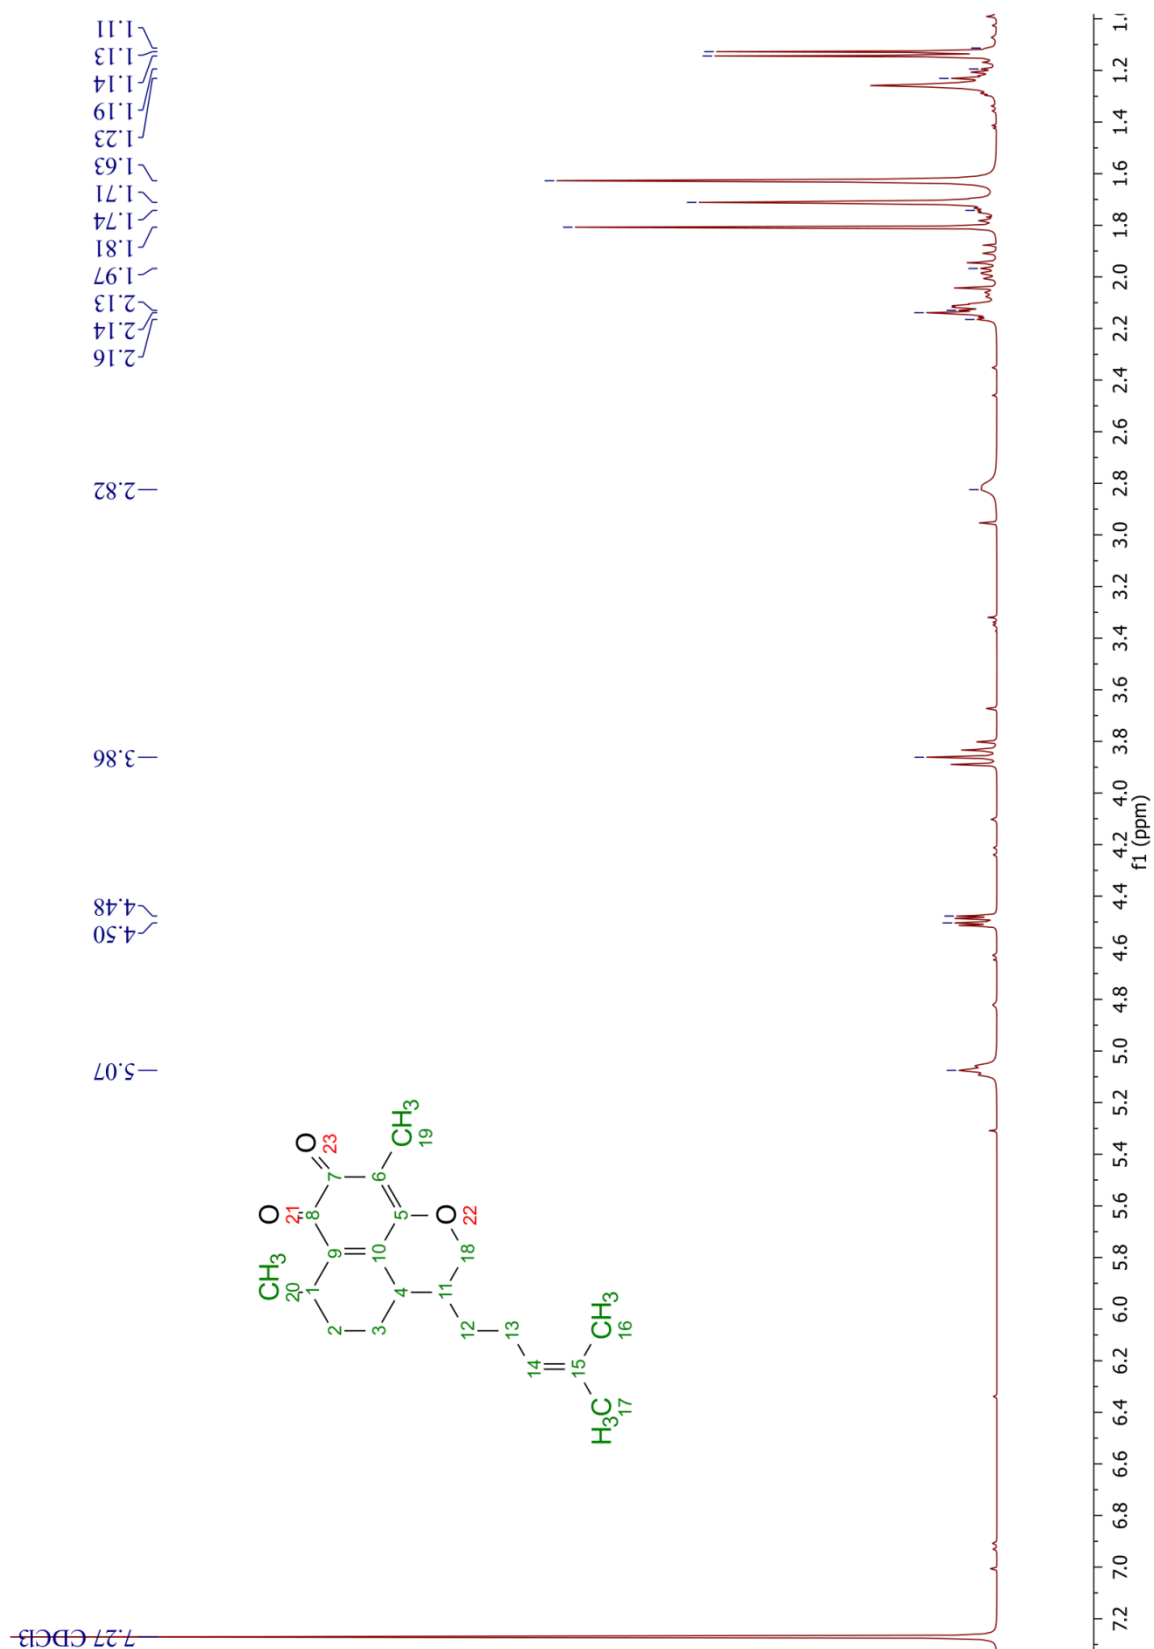



# Compound 3- <sup>13</sup>C NMR

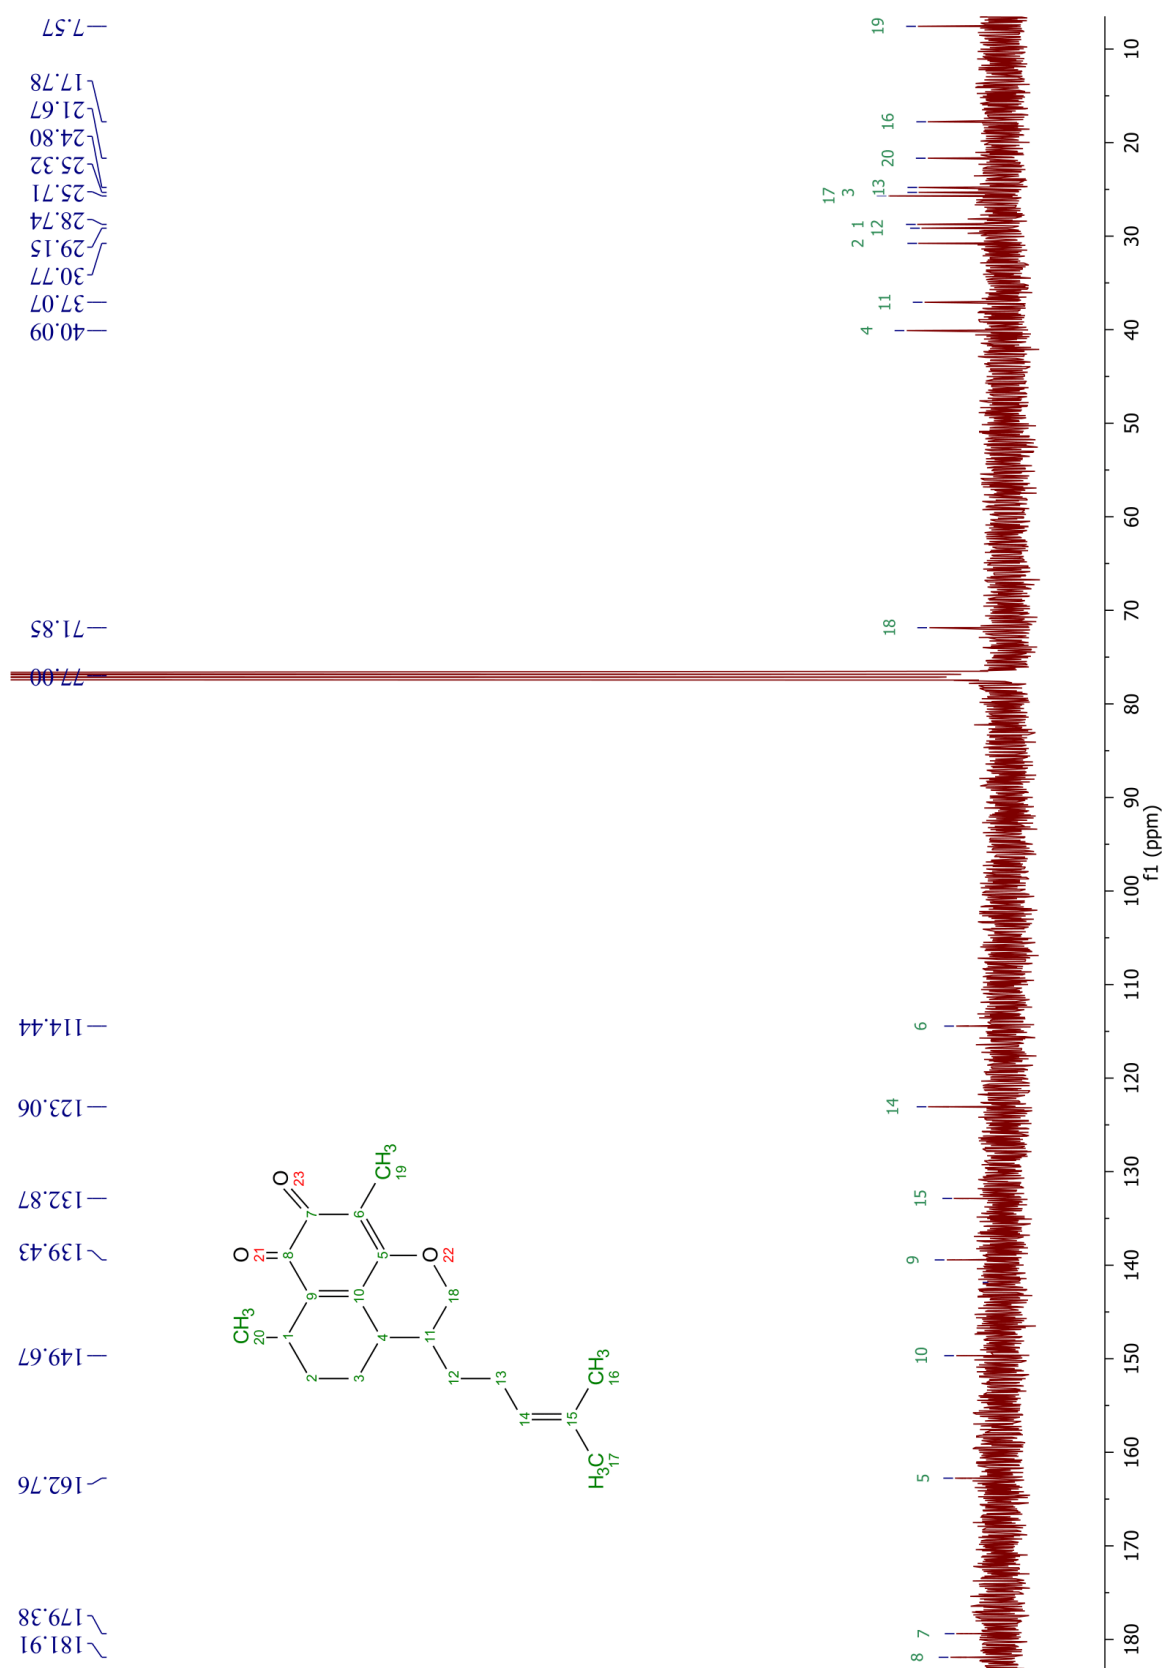

## Compound 3- $^1\text{H}$ - $^1\text{H}$ COSY

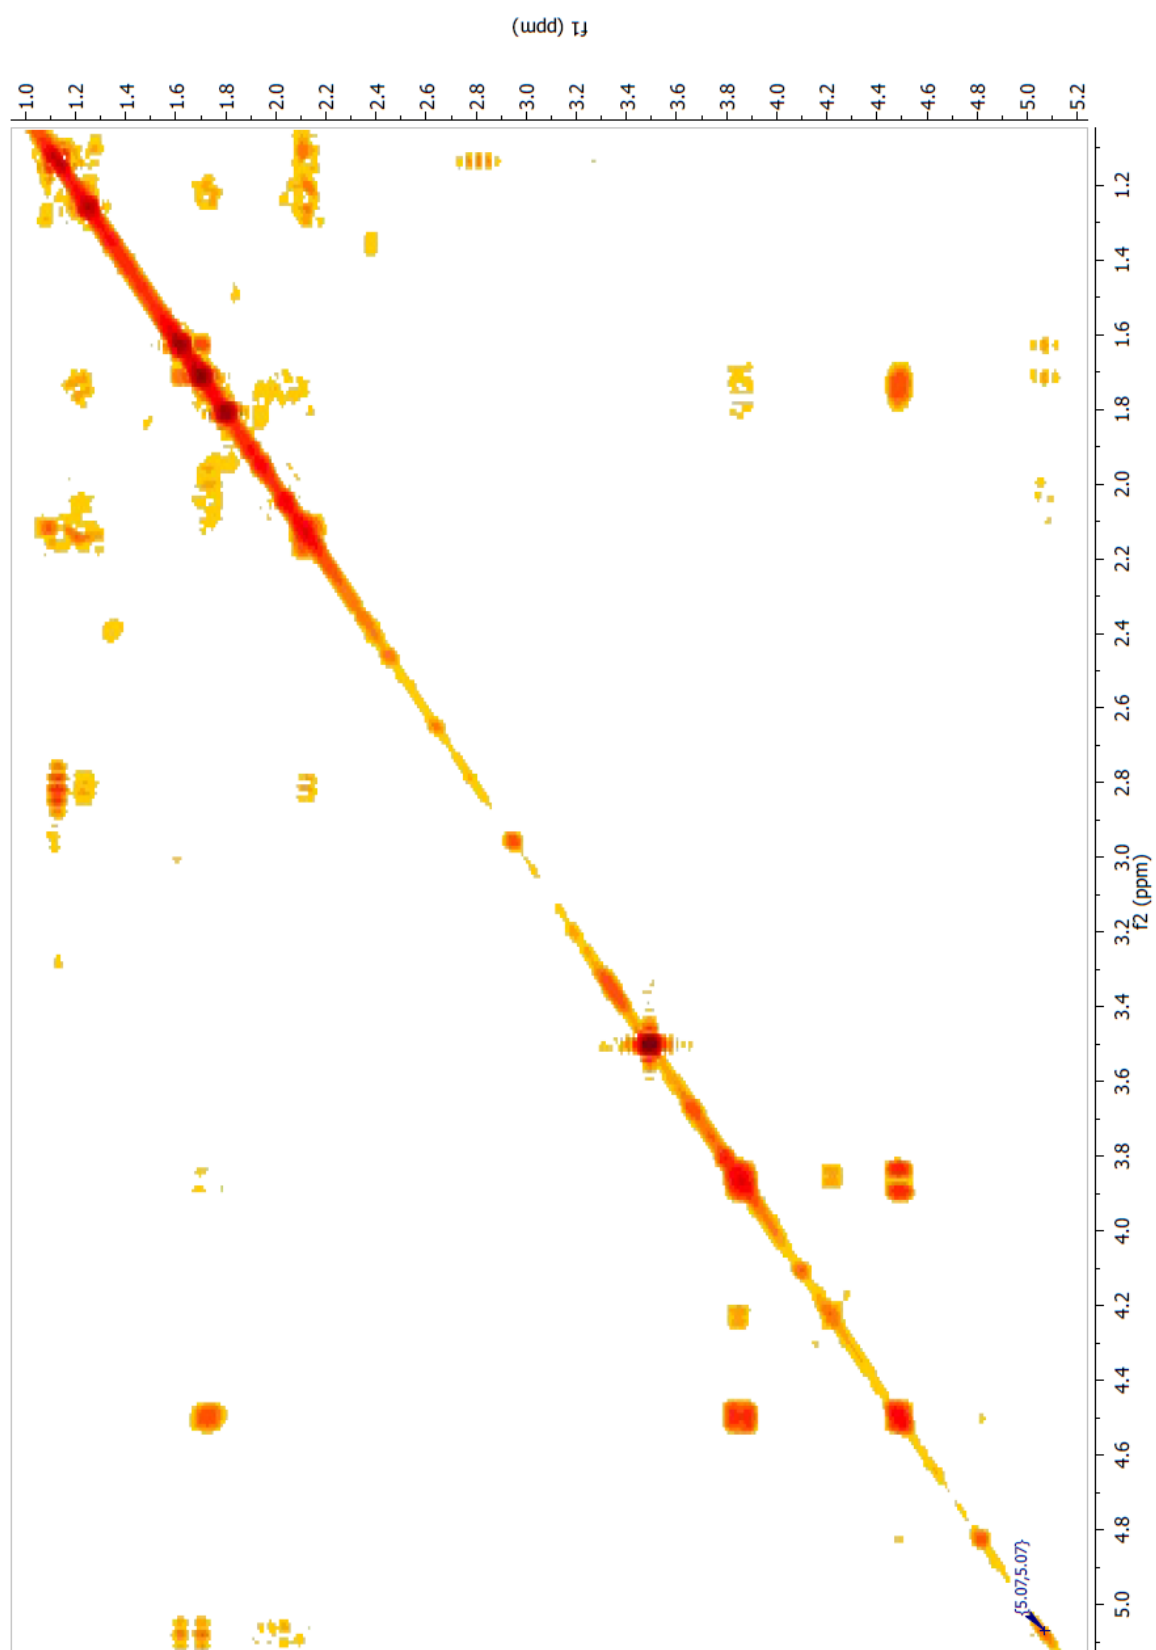

# Compound 4- <sup>1</sup>H NMR

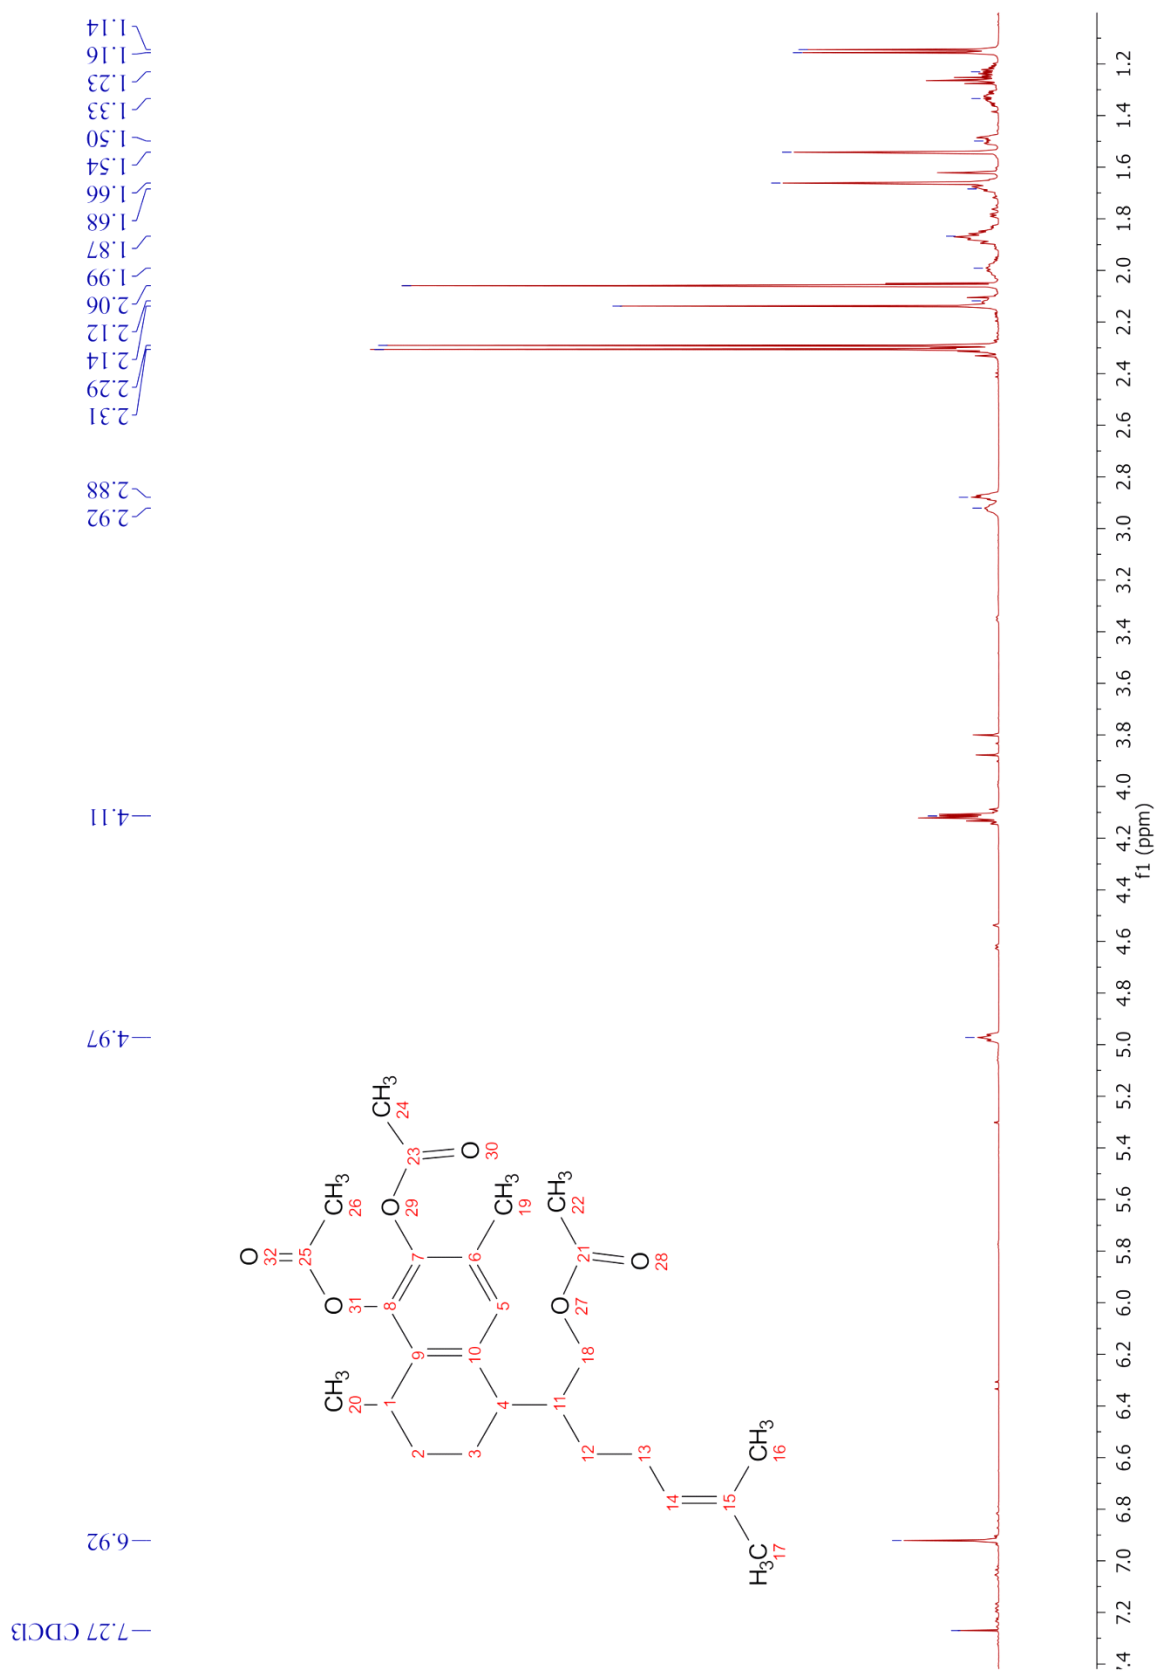

# Compound 4- <sup>13</sup>C NMR

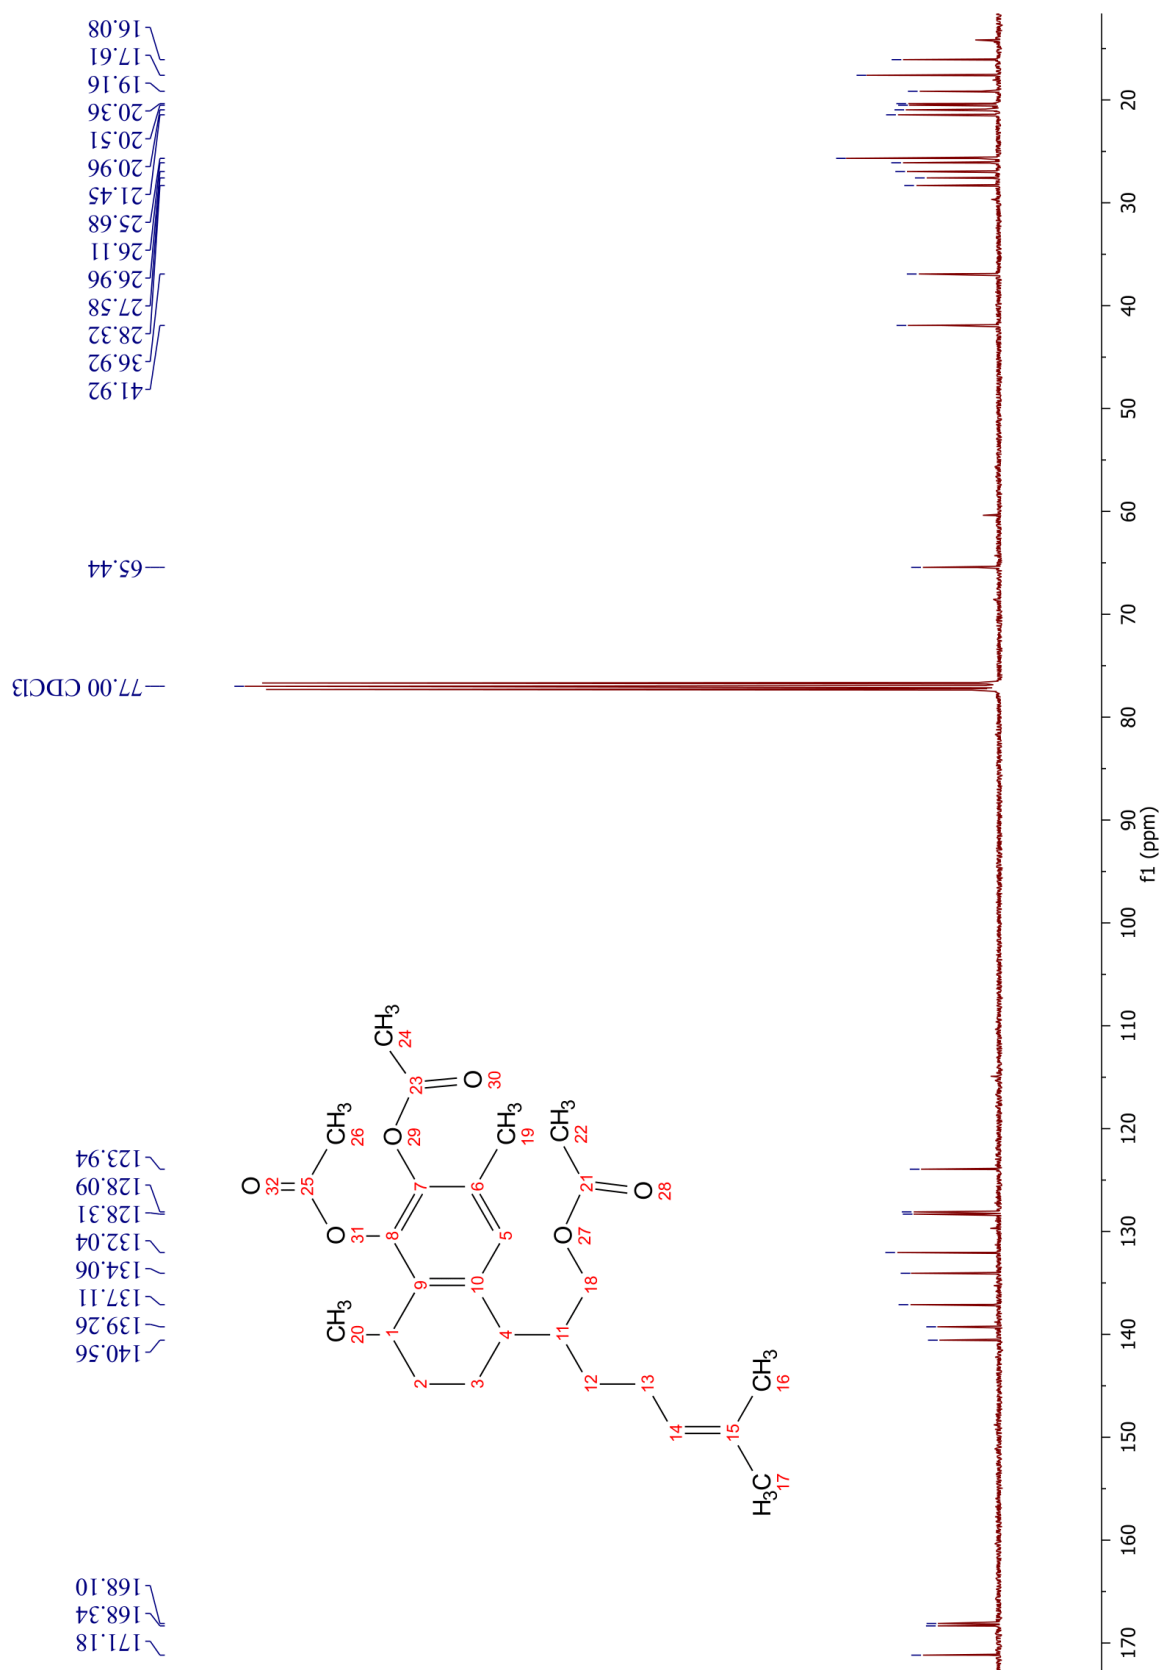

## Compound 4- $^1\text{H}$ - $^1\text{H}$ COSY

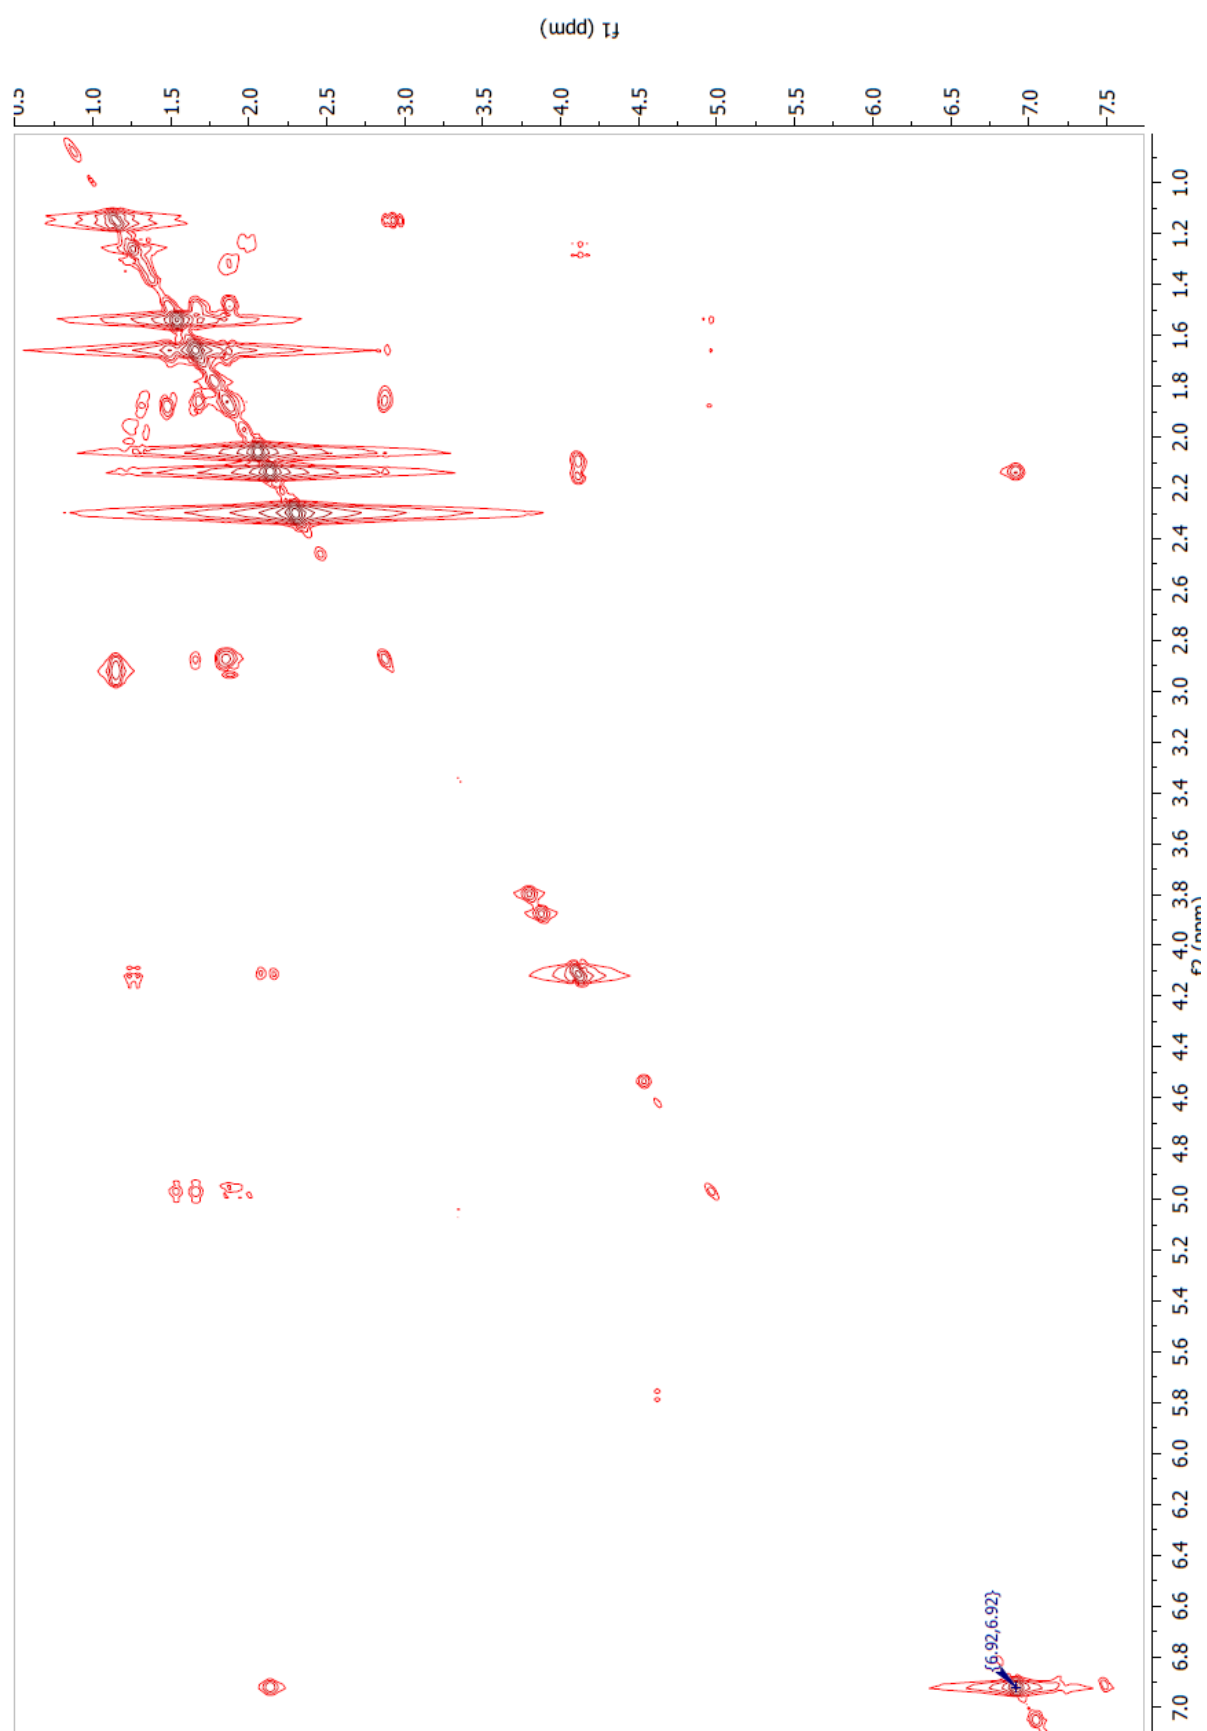

# Compound 4- $^1\text{H}$ - $^1\text{H}$ ROESY

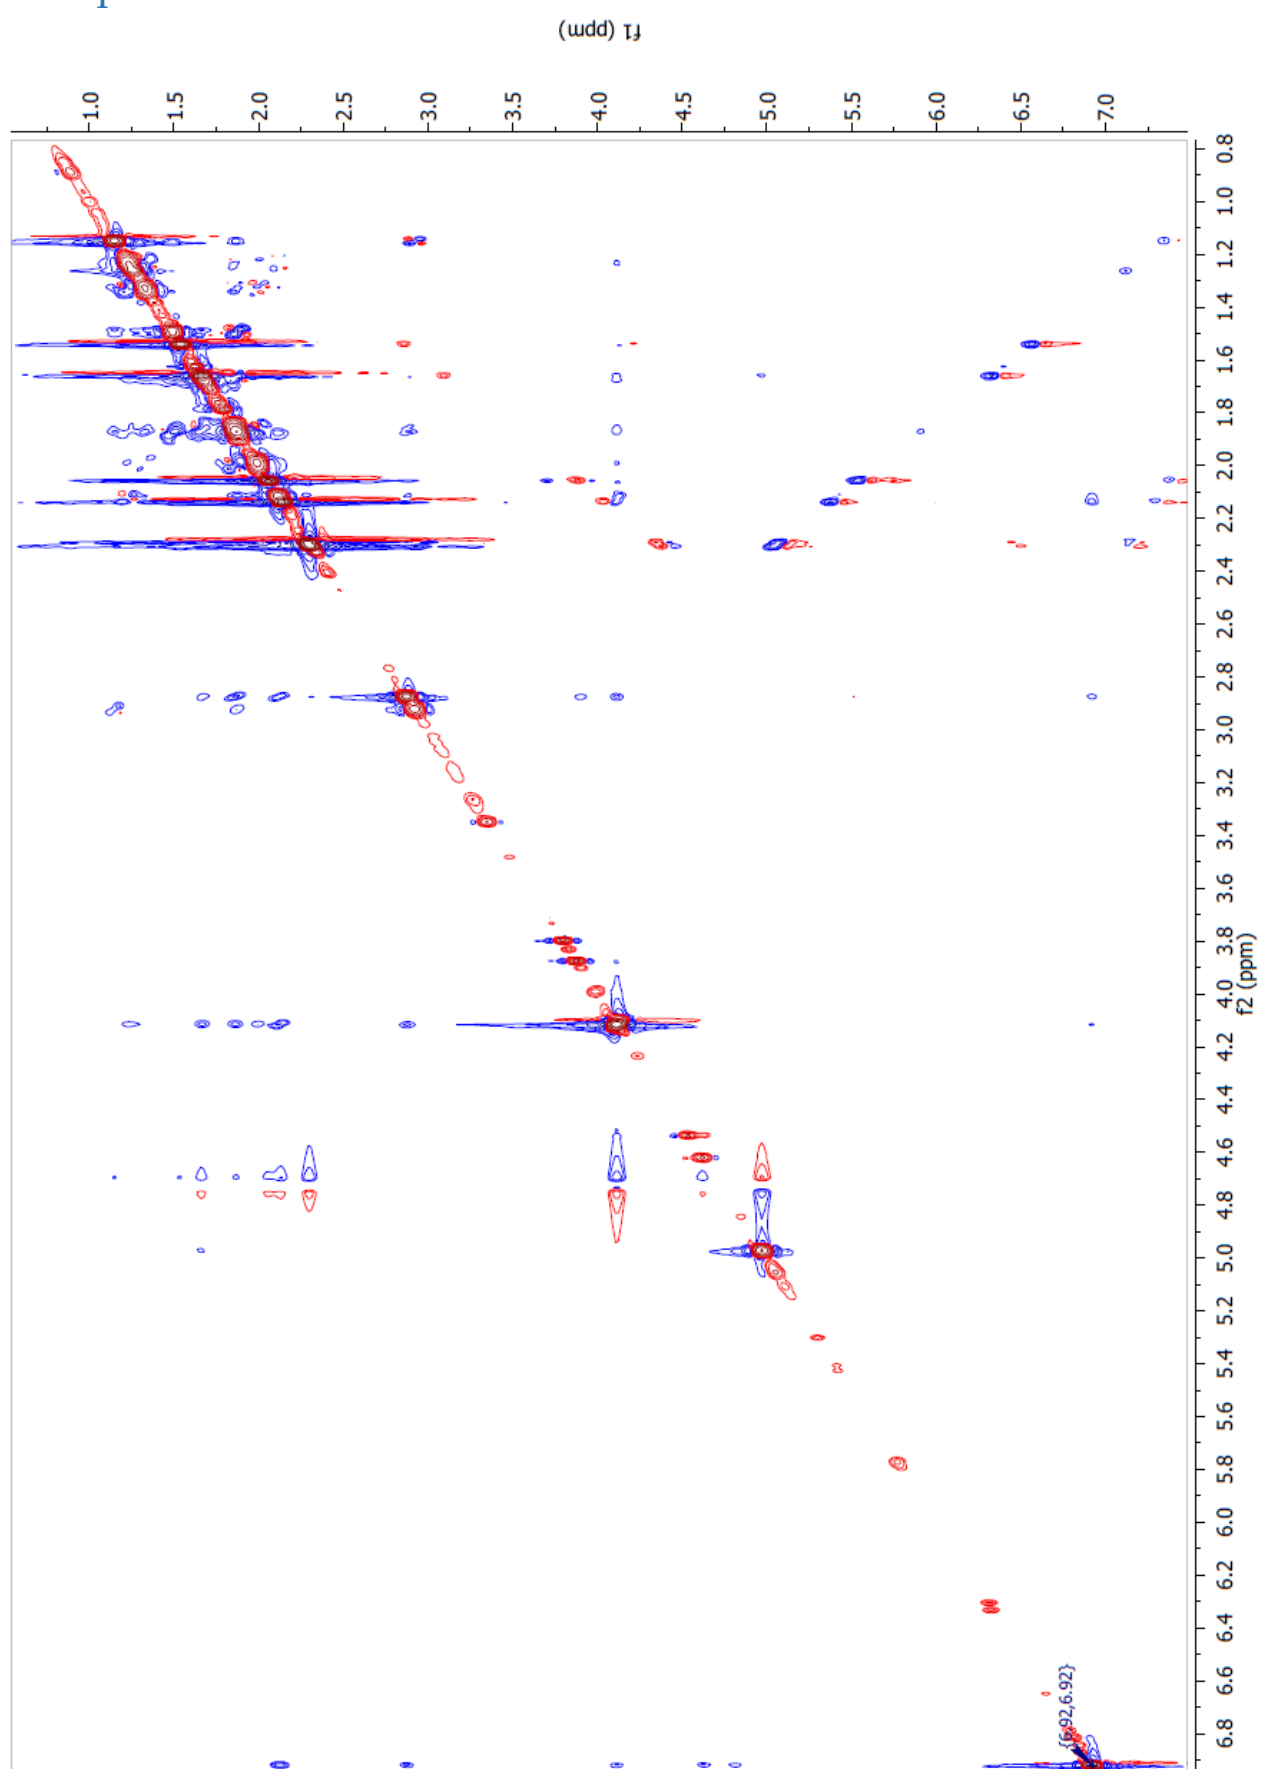

# Compound 5- <sup>1</sup>H NMR

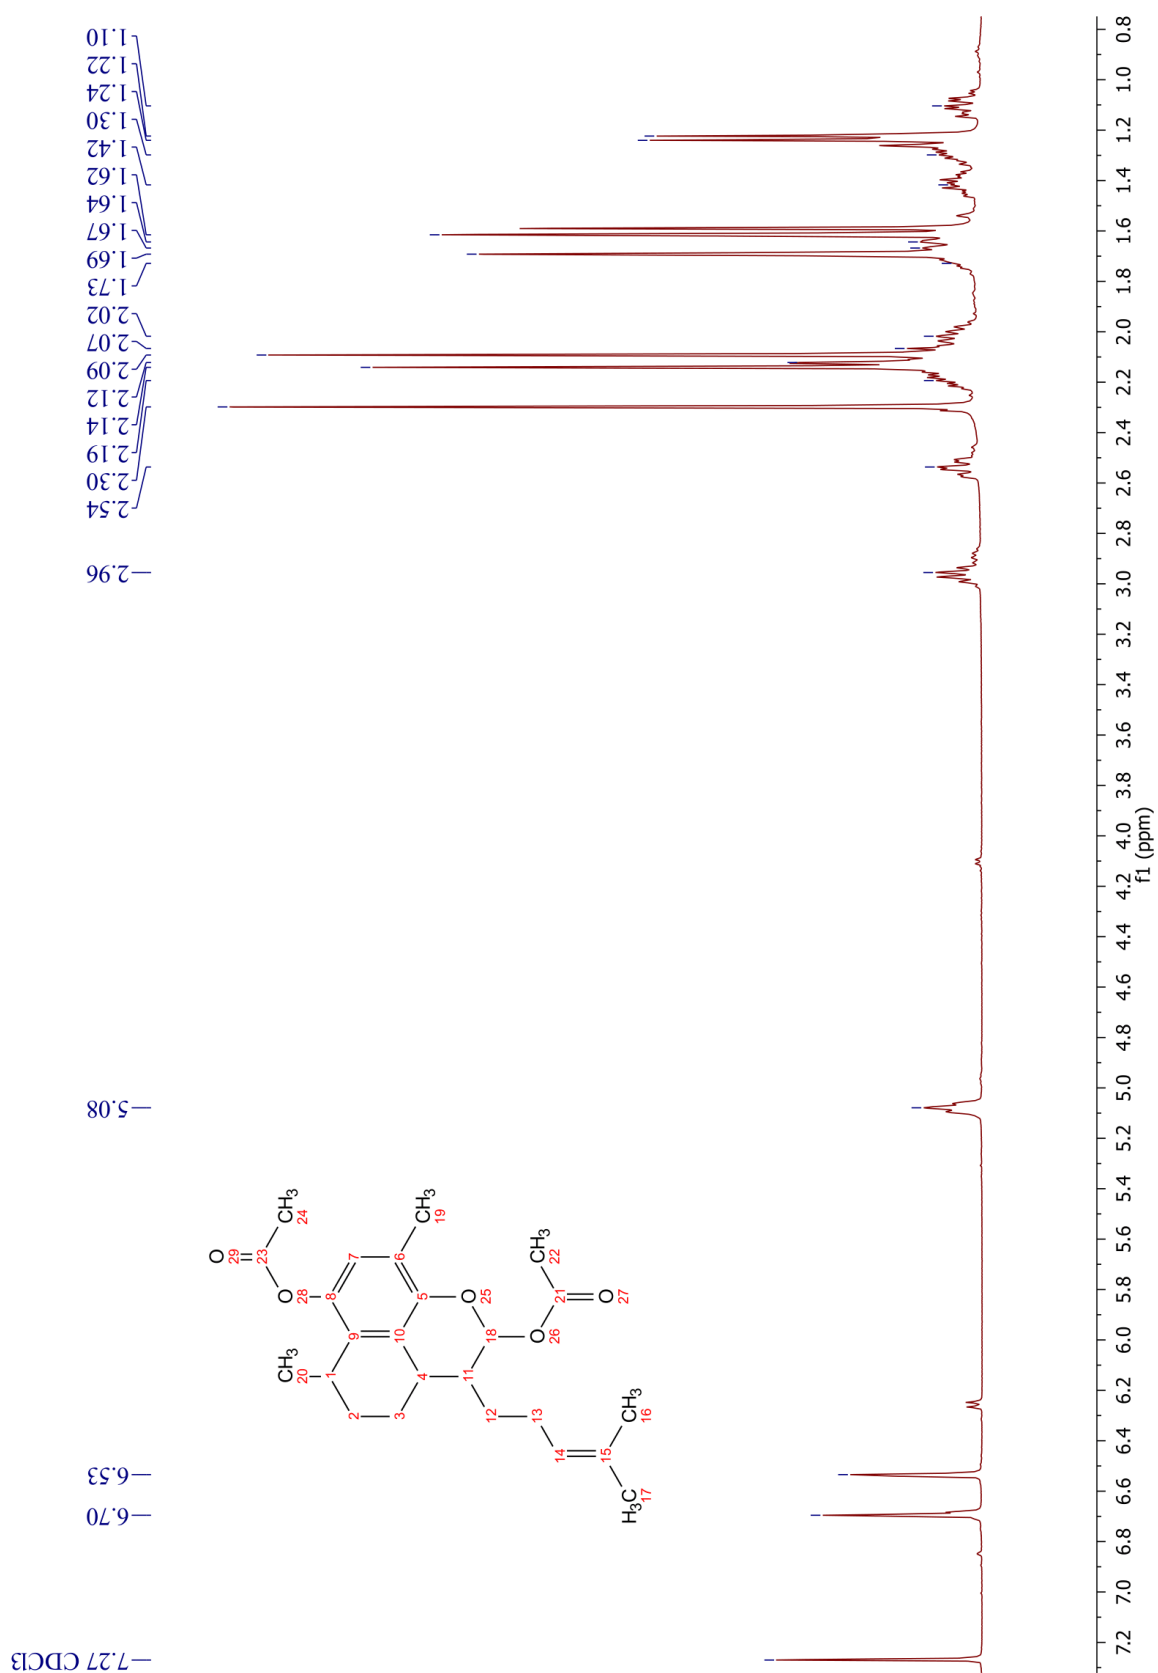

# Compound 5- <sup>13</sup>C NMR

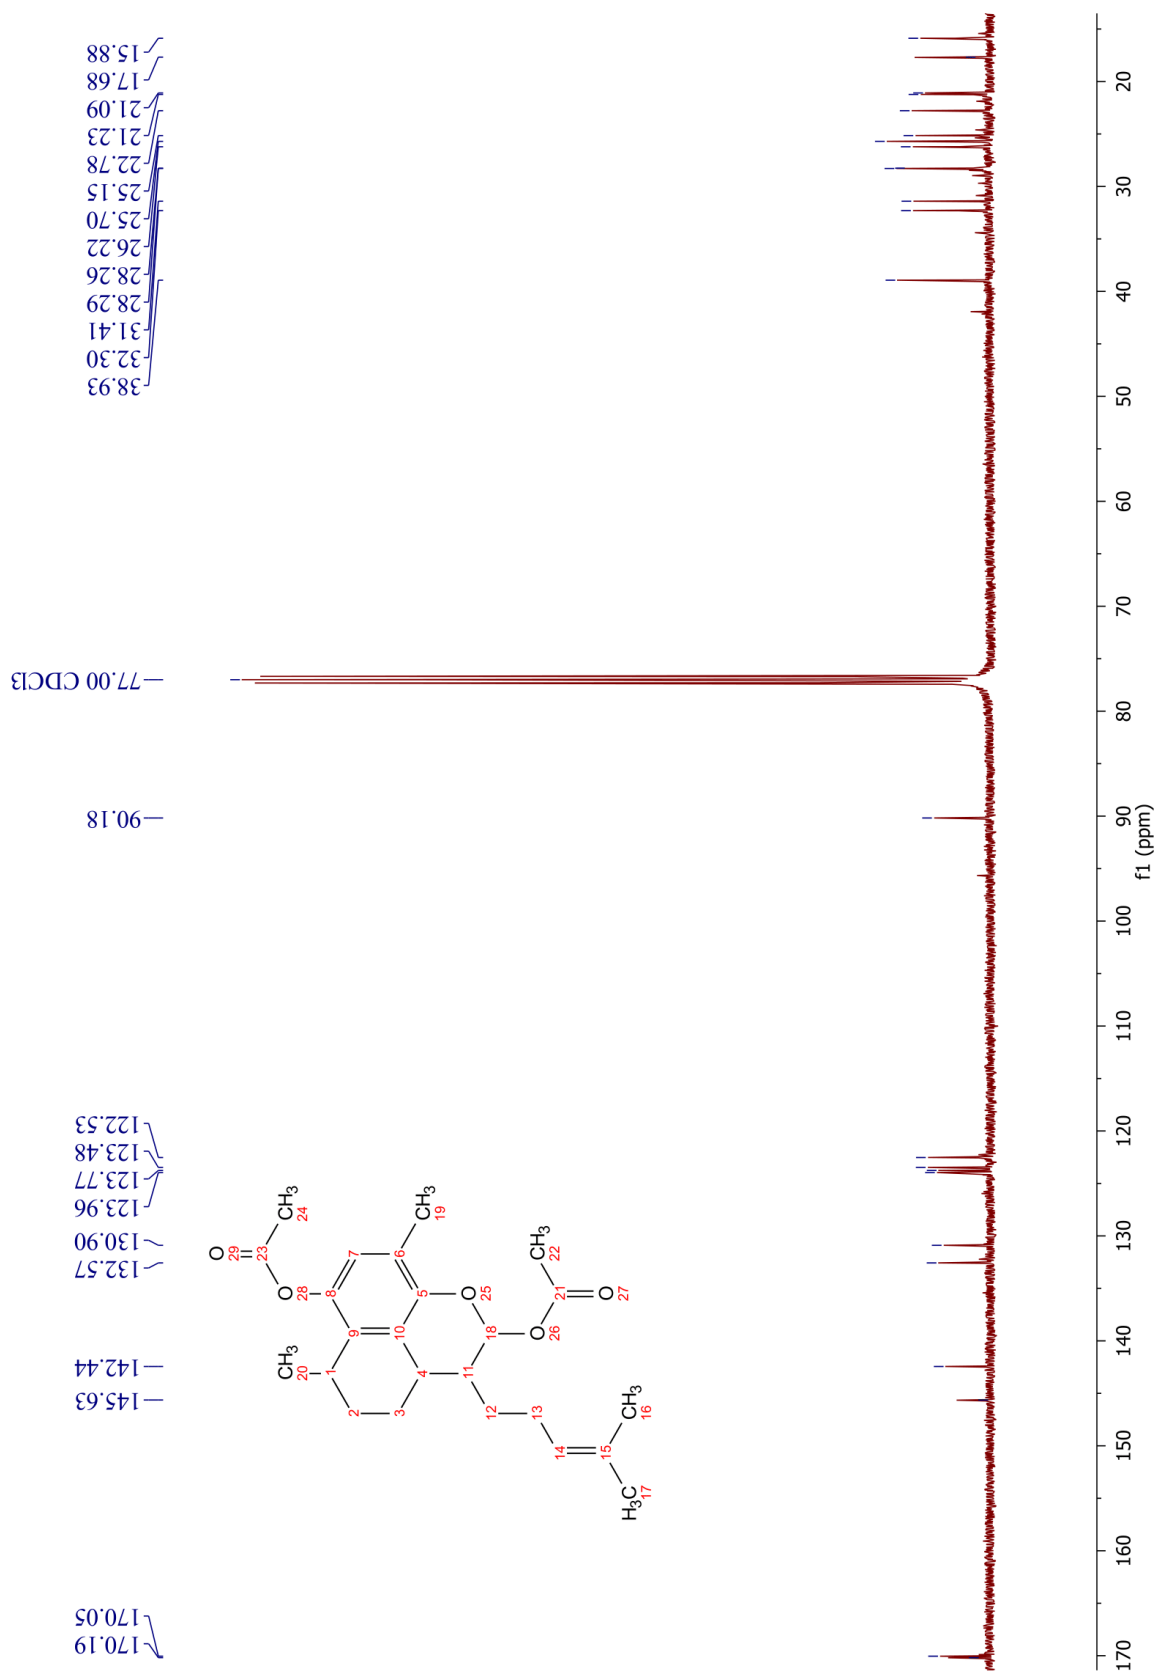



## Compound 5- $^1\text{H}$ - $^1\text{H}$ COSY

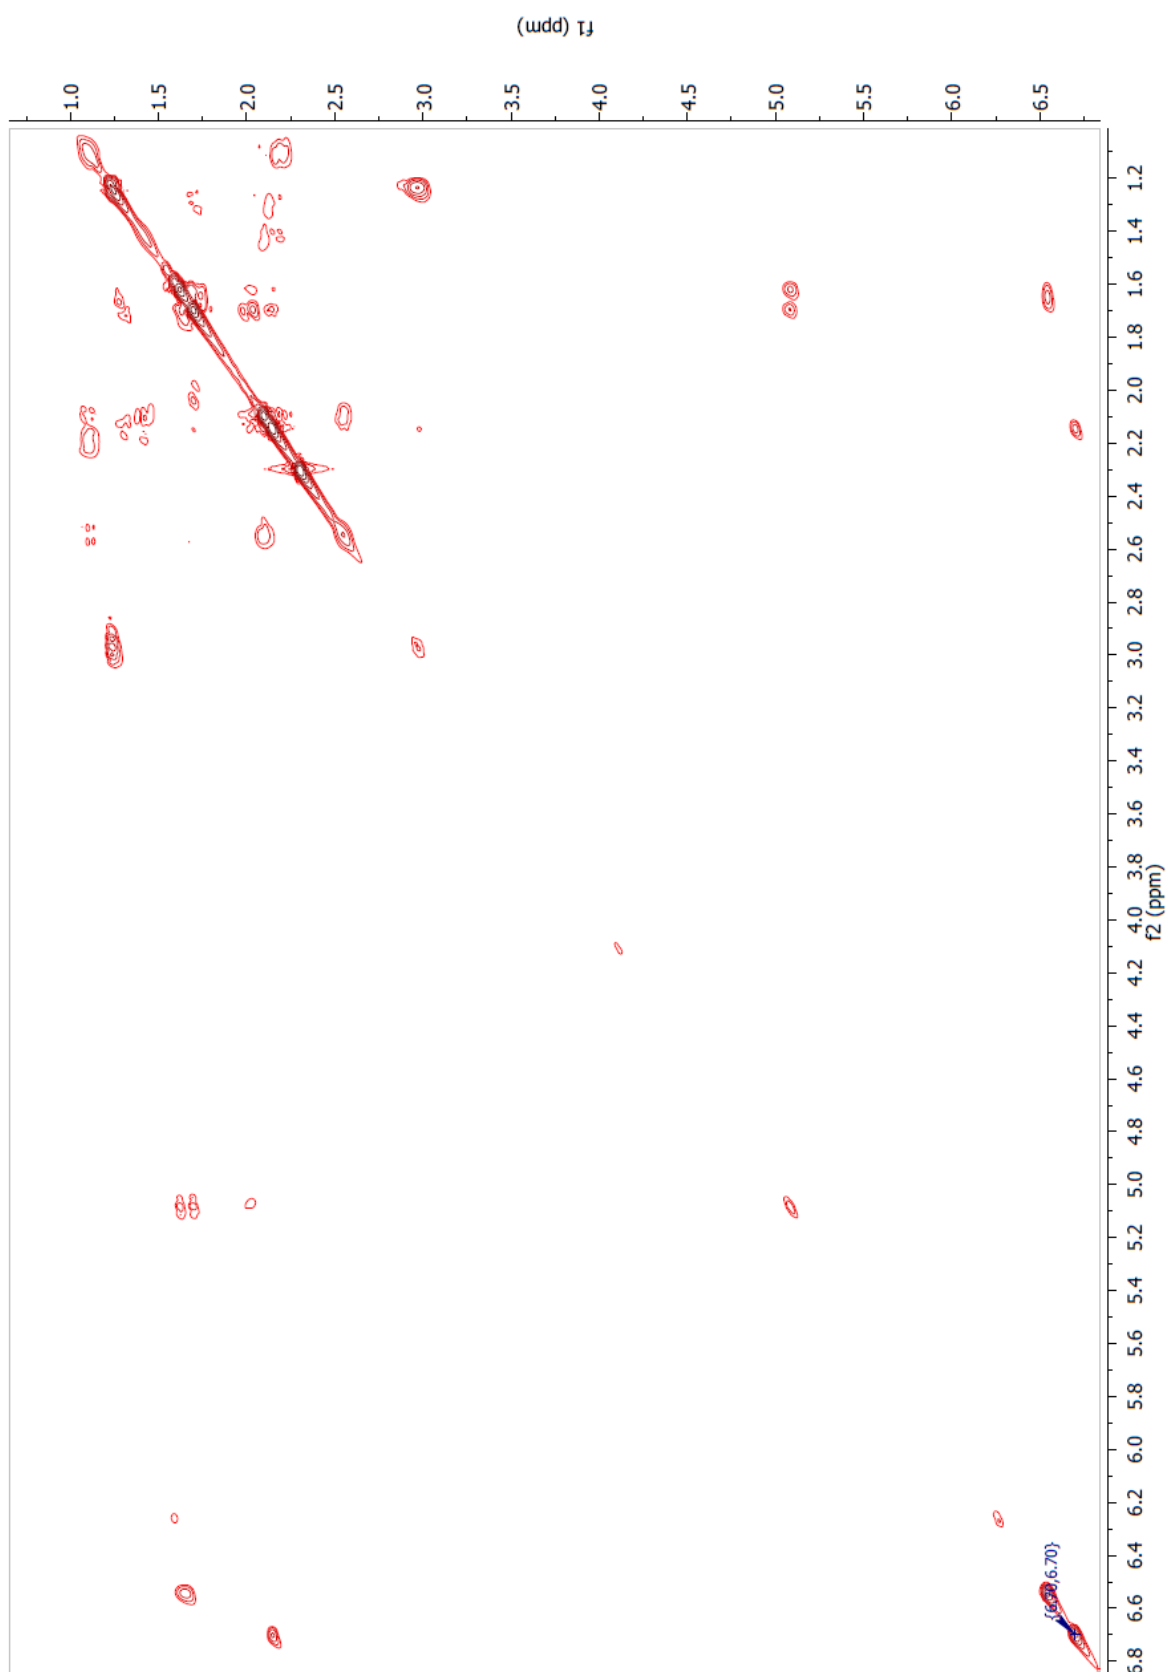

# Compound 1

## Generic Display Report

### Analysis Info

Analysis Name D:\Data\Nick-2014-files\ESI\_Positive\16-October\2014-10-16\2014-10-16-posesi-service\_000006.d  
Method 1MW Positive ESI  
Sample Name Compound A  
Comment MeOH 1 1M TOF delay 0.0006s, Q1 200 m/z

Acquisition Date 16/10/2014 10:48:13 AM  
Operator  
Instrument apex-Ultra

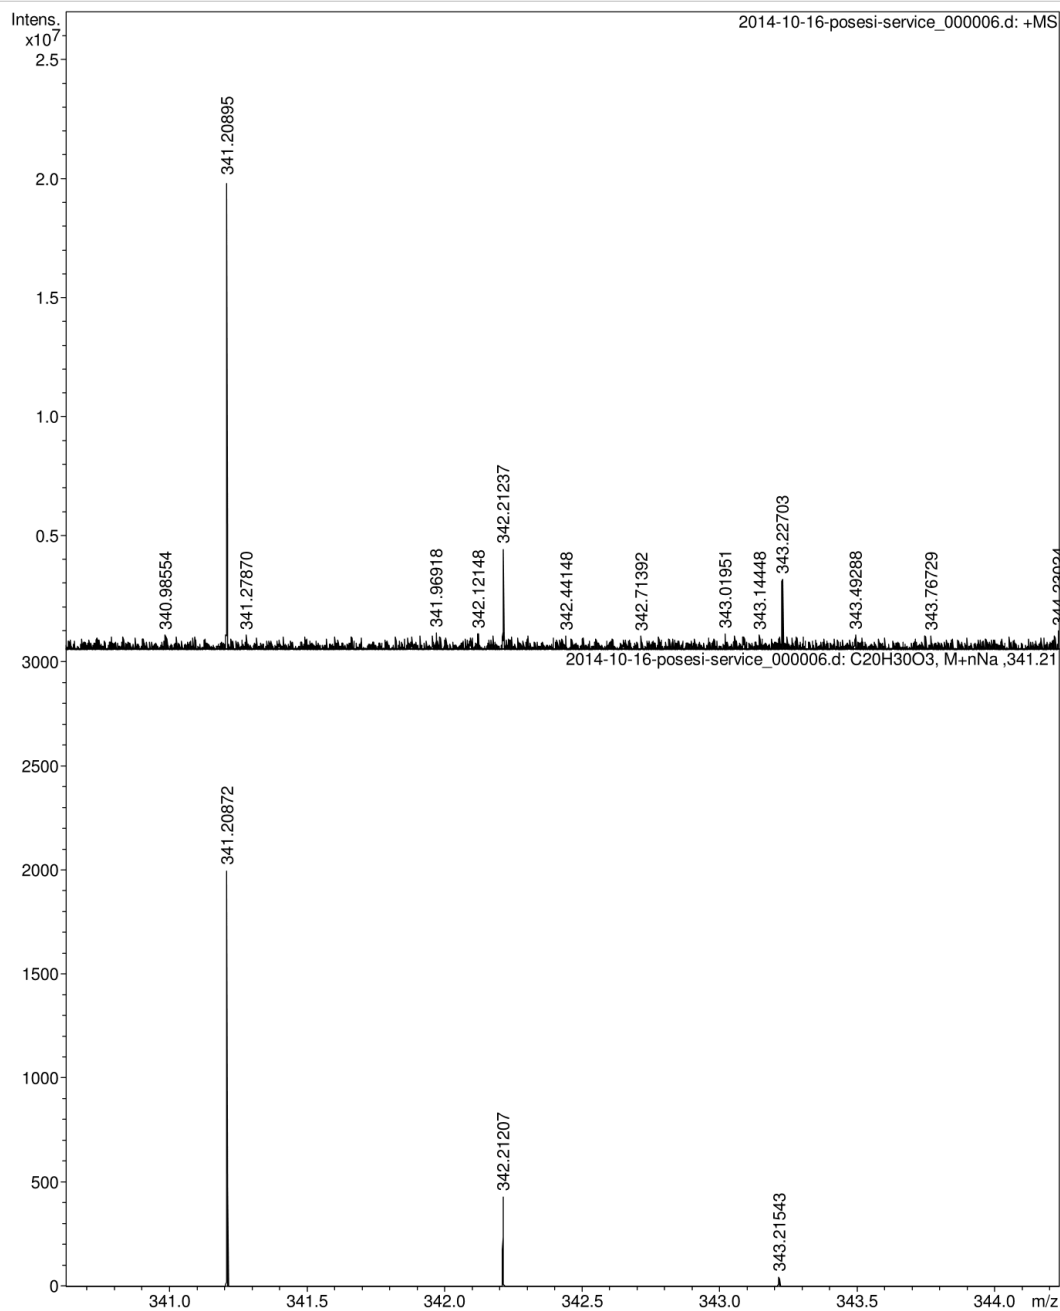

# Compound 2

## Generic Display Report

### Analysis Info

|               |                                                                                        |                  |                       |
|---------------|----------------------------------------------------------------------------------------|------------------|-----------------------|
| Analysis Name | D:\Data\Nick-2014-files\ESI_Negative\10-October\2014-10-22\2014-10-22-esi-neg_000008.d | Acquisition Date | 22/10/2014 2:49:42 PM |
| Method        | 1MW Positive ESI                                                                       | Operator         |                       |
| Sample Name   | Compound B                                                                             | Instrument       | apex-Ultra            |
| Comment       | MeOH/DCM                                                                               |                  |                       |

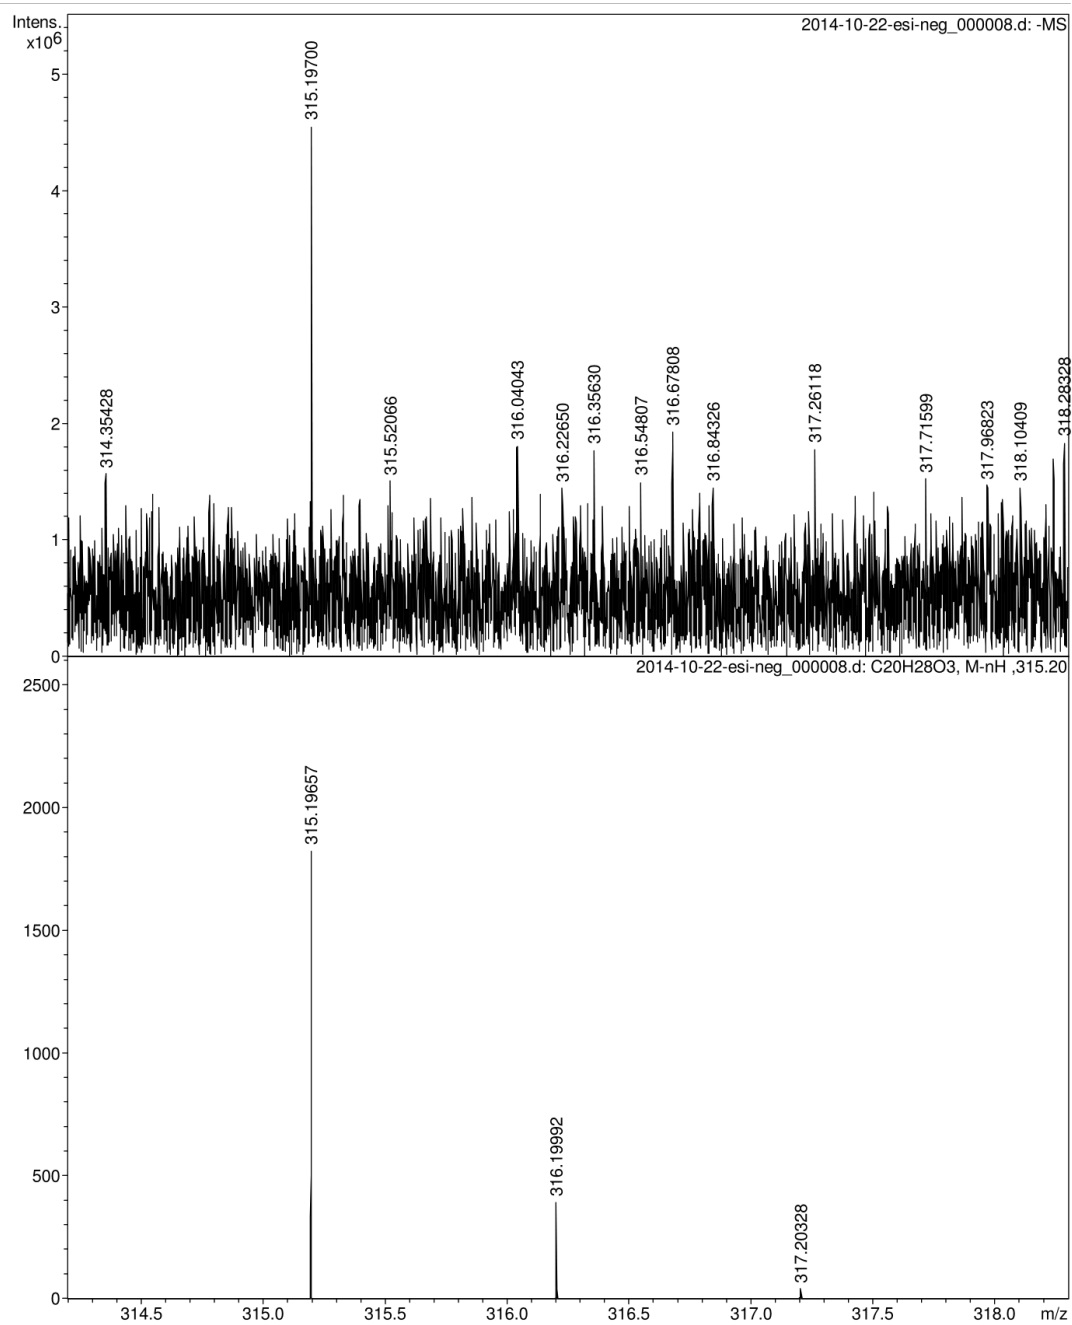

# Compound 3

## Generic Display Report

### Analysis Info

Analysis Name D:\Data\Nick-2014-files\ESI\_Positive\16-October\2014-10-16\2014-10-16-posesi-service\_000011.d  
Method 1MW Positive ESI  
Sample Name Purple  
Comment MeOH 1 1M TOF delay 0.0006s, Q1 200 m/z

Acquisition Date 16/10/2014 11:45:07 AM

Operator

Instrument apex-Ultra

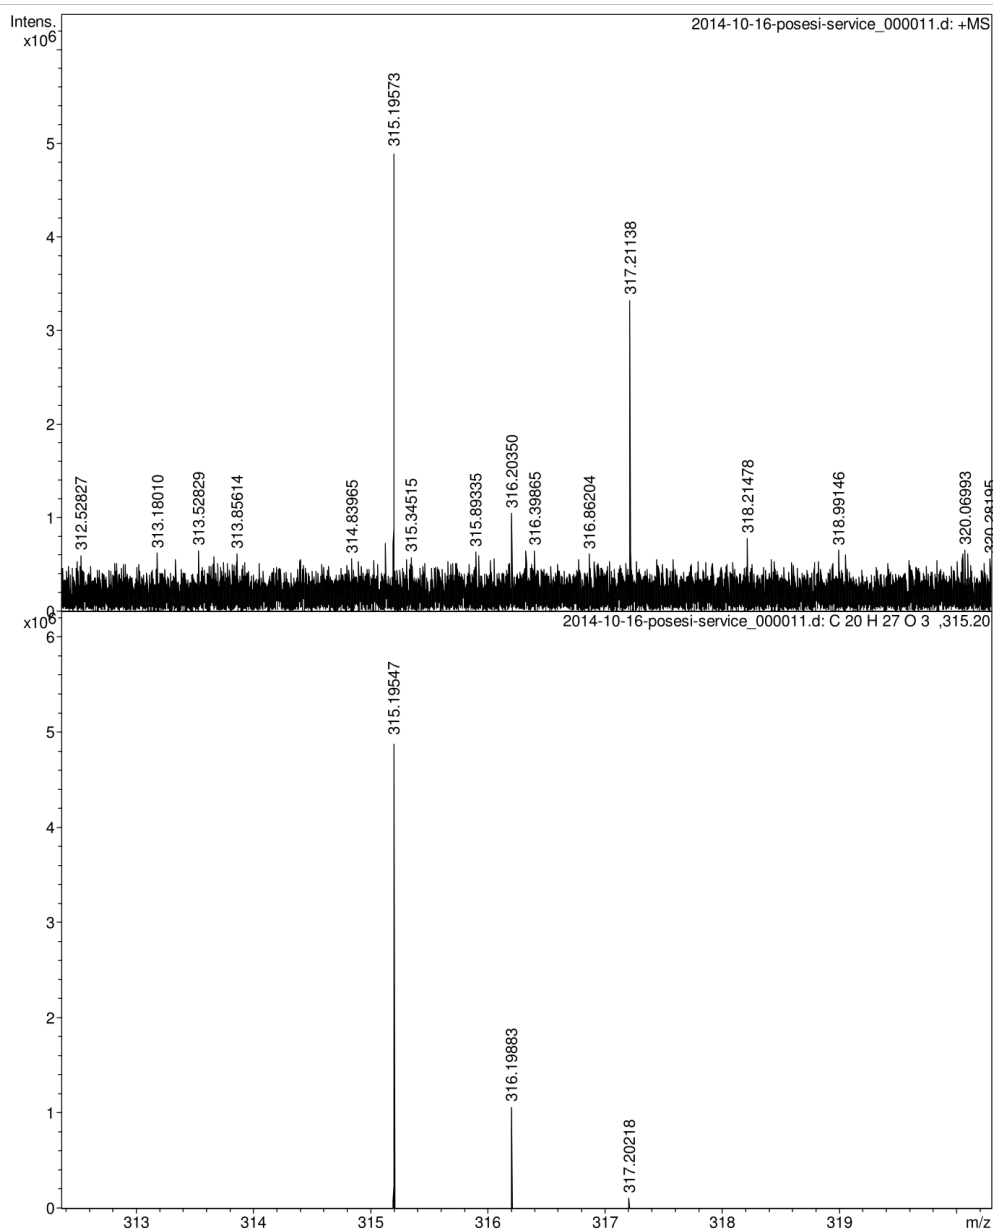

# Compound 4

## Generic Display Report

### Analysis Info

|               |                                                                                               |                  |                        |
|---------------|-----------------------------------------------------------------------------------------------|------------------|------------------------|
| Analysis Name | D:\Data\Nick-2014-files\ESI_Positive\16-October\2014-10-16\2014-10-16-posesi-service_000002.d | Acquisition Date | 16/10/2014 10:07:50 AM |
| Method        | 1MW Positive ESI                                                                              | Operator         |                        |
| Sample Name   | Acetylated A                                                                                  | Instrument       | apex-Ultra             |
| Comment       | MeOH 1 1M TOF delay 0.0006s, Q1 200 m/z                                                       |                  |                        |

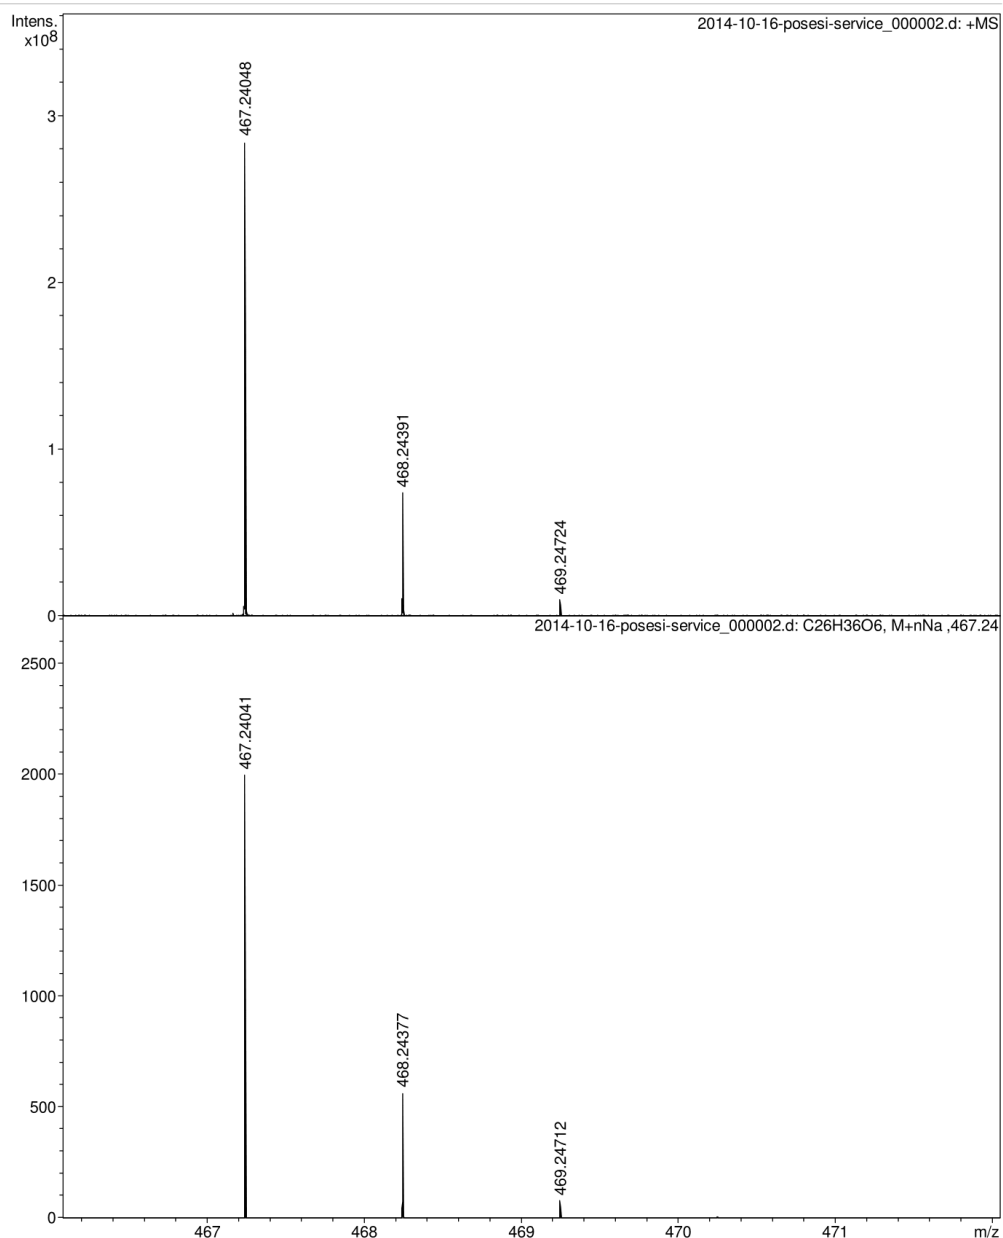

# Compound 5

## Generic Display Report

### Analysis Info

Analysis Name D:\Data\Nick-2014-files\ESI\_Positive\16-October\2014-10-16\2014-10-16-posesi-service\_000004.d  
Method 1MW Positive ESI  
Sample Name Acetylated B  
Comment MeOH 1 1M TOF delay 0.0006s, Q1 200 m/z

Acquisition Date 16/10/2014 10:28:02 AM

Operator

Instrument apex-Ultra

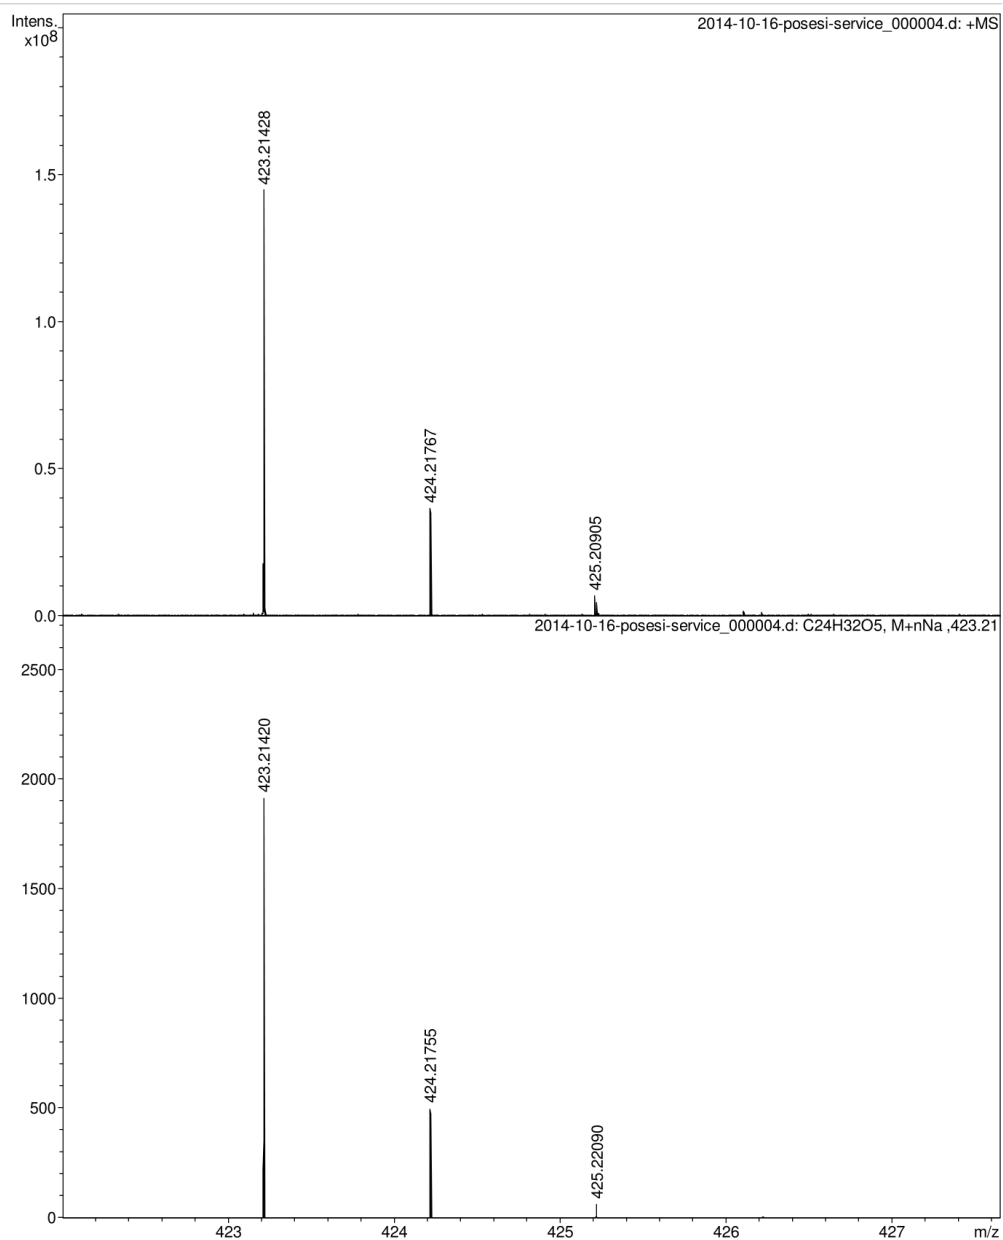

## Schematic formation of compound 3

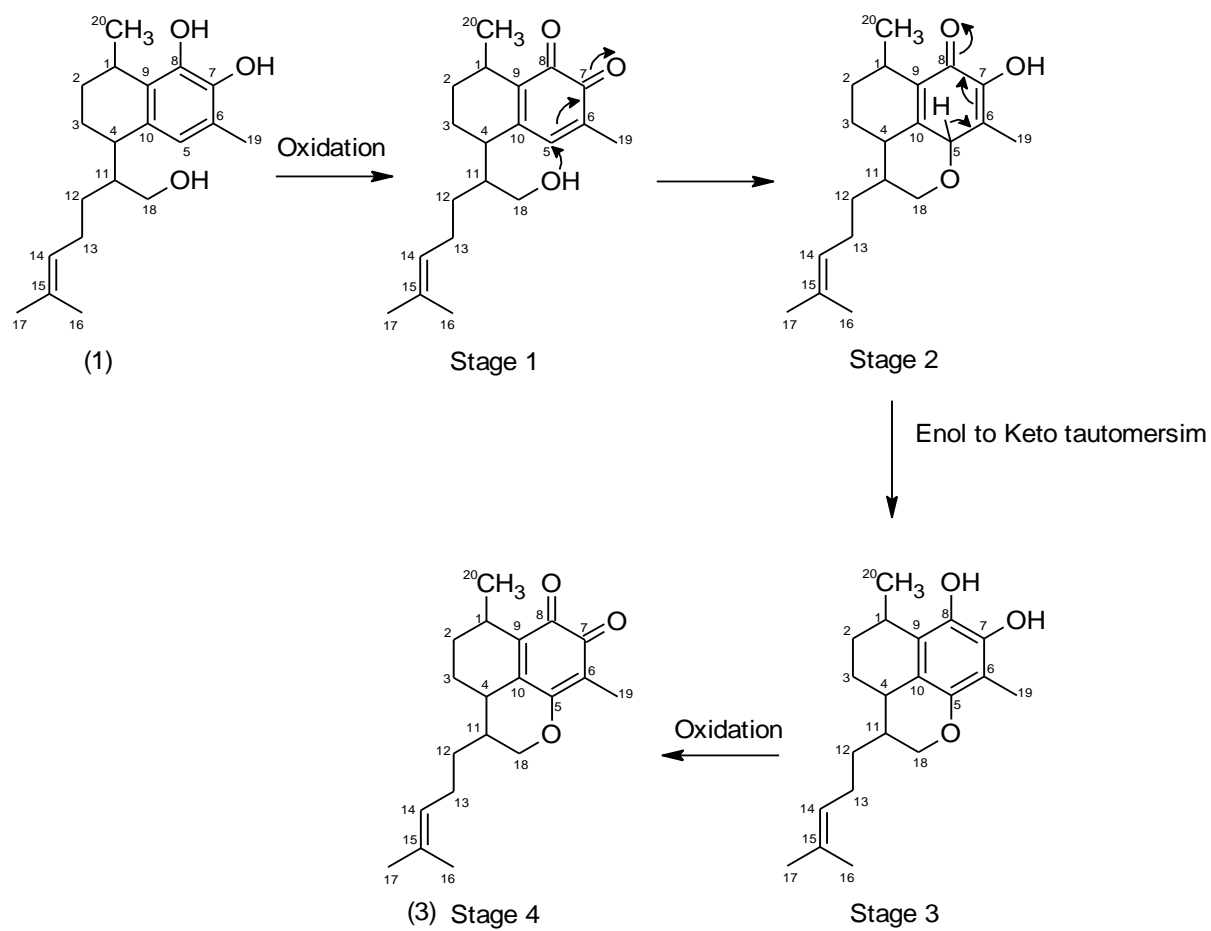

Supplement: s1 [file s1]
